## 1                    **Fructose Metabolism Contributes to the Warburg effect**

2  
3        Bing Han<sup>1#</sup>, Lu Wang<sup>1#</sup>, Jingyu Zhang<sup>4</sup>, Meilin Wei<sup>1</sup>, Cynthia Rajani<sup>1</sup>, Runming Wei<sup>1</sup>, Jingye  
4            Wang<sup>1</sup>, Haining Yang<sup>1</sup>, Michele Carbone<sup>1</sup>, Guoxiang Xie<sup>1,2</sup>, Wen Zhou<sup>4</sup>, Wei Jia<sup>1,3\*</sup>

5  
6  
7  
8  
9  
10  
11  
12        Fructose metabolism is increasingly recognized as a preferred energy source for  
13        cancer cell proliferation. However, it remains unclear why cancer cells favor  
14        fructose metabolism and how they acquire a sufficient amount of fructose. Here we  
15        report that cancer cells convert glucose into fructose through intra- and  
16        extracellular polyol pathways. The fructose metabolism bypasses normal aerobic  
17        respiration's self-control to supply excessive metabolites to glycolysis and  
18        promotes the Warburg effect. Inhibition of fructose production drastically  
19        suppressed glycolysis and ATP production in cancer. Furthermore, we determined  
20        that a glucose transporter, SLC2A8/GLUT8, exports intracellular fructose to other  
21        cells in the tumor microenvironment. Taken together, our study suggests that the  
22        Warburg effect is achieved by means of fructose metabolism, instead of glucose  
23        metabolism alone.

24  

---

1. Cancer Biology Program, University of Hawaii Cancer Center, Honolulu, HI, 96813, USA. 2. Human Metabolomics Institute, Inc., Shenzhen, Guangdong, 518109, China. 3. School of Chinese Medicine, Hong Kong Baptist University, Kowloon Tong, Hong Kong. 4. Cancer Research Institute, School of Basic Medical Sciences, Central South University, Changsha, Hunan, China. #Equal contributions. Correspondence: weijia1@hkbu.edu.hk.

25 Cancer cells consume excessive amounts of glucose to sustain their  
26 unrestricted proliferation<sup>1</sup>. We previously reported that cancer cells such as acute  
27 myeloid leukemia cells exhibited enhanced fructose utilization under low glucose  
28 conditions and that pharmacologic blockade of fructose utilization suppressed  
29 AML cell proliferation and enhanced the therapeutic efficacy of Ara-C<sup>2</sup>. Our recent  
30 findings, along with reports from other groups<sup>1-4</sup>, suggest that fructose is a  
31 preferred carbon source for many cancer cells. High expression of the fructose  
32 transporter SLC2A5/GLUT5 was found in multiple types of cancers, enabling  
33 increased uptake of fructose from the microenvironment and enhanced cancer  
34 growth and development. However, dietary fructose is mostly converted to  
35 glucose, glycogen, and organic acids in the intestine and liver<sup>5</sup>. Therefore, the  
36 fasting blood levels of fructose are about 1,000-fold lower (~0.005 mM) than  
37 glucose (~5.5 mM) under normal physiological conditions. We thus hypothesized  
38 that this unique metabolic feature in cancer cells must arise from additional  
39 fructose sources and that increased fructose utilization conferred advantages over  
40 the use of glucose.

41 The polyol pathway is commonly present in somatic cells. It converts about  
42 3% of intracellular glucose to fructose under normal physiological conditions in a  
43 two-step process<sup>6</sup>. The first step involves reducing glucose to sorbitol utilizing the  
44 reducing equivalents from NADPH and the aldose reductase enzyme, AKR1B1.  
45 The second step is the oxidation of sorbitol to fructose via sorbitol dehydrogenase  
46 (SORD) and the conversion of NAD<sup>+</sup> to NADH.

47 Dr. Otto Heinrich Warburg first observed that cancer cells tend to ferment  
48 glucose to lactic acid even in aerobic conditions, a phenomenon later known as  
49 “aerobic glycolysis, or the Warburg effect”. The current understanding of this  
50 phenomenon is that glucose fermentation promotes biomass synthesis in cancers to  
51 maintain cell proliferation<sup>7</sup>. The Warburg effect has been extensively studied and

52 also found in non-cancerous, high-proliferating cells, such as T lymphocytes<sup>8</sup>,  
53 however its precise metabolic mechanism remains unclear.

54

### 55 **Intra and extracellular polyol pathways supply fructose to cancer cell** 56 **metabolism**

57 This study revealed non-dietary sources of fructose produced by both intra-  
58 and extracellular polyol pathways as a result of cancer-mediated metabolic  
59 reprogramming. First, we identified significant levels of <sup>13</sup>C-fructose in 11 out of  
60 12 cancer cell lines that were incubated with <sup>13</sup>C-glucose (Fig. 1a). Basal levels of  
61 fructose were also detected in the two control cell lines, the pancreatic epithelial  
62 cell, HPDE6C7, and the mammary epithelial cell line, MCF-10A. We then tested  
63 the fructose-conversion rate in the A549 cell line. The results showed that A549  
64 cells converted glucose to fructose rapidly and that their intracellular <sup>13</sup>C-fructose  
65 level reached a saturation point after 2 hours of treatment with 25 mM <sup>13</sup>C-glucose.  
66 We also found that the intracellular <sup>13</sup>C-fructose level was equal to intracellular  
67 <sup>13</sup>C-glucose after 2 hours (Fig. 1b). Therefore, we estimated that about 50% of the  
68 glucose taken up by A549 cells was converted to fructose.

69 In addition to intracellular production of fructose, we unexpectedly found that  
70 in two common commercial brands of FBS, there were high concentrations  
71 (approximately a double amount) of fructose relative to glucose (Fig. 1c). To  
72 identify the possible reasons for high fructose levels in FBS, we selected regular,  
73 heat-inactivated (HI), active charcoal striped, and dialyzed FBSs purchased from  
74 two major commercial vendors (VWR and Gibco) for this study. We adjusted  
75 every FBS sample to 25mM of <sup>13</sup>C-glucose and cultured them at 37°C, 5% CO<sub>2</sub> for  
76 0, 8, 24, and 48 hours. The <sup>13</sup>C-fructose levels increased with culture time in all the  
77 FBS samples and different conversion rates were observed depending on the type

78 of FBS sample (Fig. 1d). These results revealed a novel source of fructose: a  
79 mechanism that naturally converts glucose to fructose in blood.

80 The polyol pathway is the only known physiological reaction to convert  
81 glucose to fructose intracellularly. We analyzed two enzymes involved in the  
82 polyol pathway, AKR1B1 and SORD, at both gene (Extended Data Fig. 1a) and  
83 protein (Extended Data Fig. 1b) levels and found that all cancer and control cell  
84 lines expressed varying levels of these two genes. We then examined the human  
85 TCGA pan-cancer database (Extended Data Fig. 1c), and confirmed that all human  
86 cancers express AKR1B1 and SORD, which suggested that the polyol pathway  
87 was active as an essential metabolic feature in all types of cancer. To identify  
88 whether the polyol pathway also processes extracellular glucose-fructose  
89 conversion, we then assayed the AKR1B1 and SORD proteins in FBS by Western  
90 Blot (Extended Data Fig. 1d). Both of these two components were found in all  
91 tested samples with varying amounts. Additionally, we measured the  
92 concentrations of AKR1B1 and SORD in sera of 10 healthy donors, 16 lung  
93 cancer, 8 colorectal cancer, and 22 multiple myeloma patients. Serum levels of  
94 AKR1B1 were significantly higher in all cancer patients than healthy controls,  
95 while serum levels of SORD were significantly increased in colorectal cancer and  
96 multiple myeloma patients, but not in lung cancer (Fig. 1e). We then blocked the  
97 intracellular and extracellular polyol pathway by AKR1B1 gene knocked out (KO)  
98 (Extended Data Fig. 1e) or epalrestat<sup>9</sup>, an AKR1B1 inhibitor, respectively, to  
99 verify the role of the polyol pathway in glucose-fructose conversion. Inhibition of  
100 AKR1B1 by either method effectively decreased the intracellular (Fig. 1f) and  
101 extracellular (Fig. 1g) fructose concentrations. These results provide evidence for  
102 the activity of the polyol pathway in cancer cells and serum.

103 As a result of AKR1B1 gene KO in cancer cells, the fructose specific  
104 metabolite, fructose-1-phosphate (F-1-P), was significantly decreased as shown in

105 Fig. 1h and Extended Data Fig. 1f. Inhibition of the polyol pathway did not have  
106 the same effect on the production of the two glucose-specific metabolites, glucose-  
107 6-phosphate (G-6-P) and fructose-6-phosphate (F-6-P), in the four cancer cell lines  
108 (Fig. 1h and Extended Data Fig. 1g). Therefore, AKR1B1 KO blocked <sup>13</sup>C-fructose  
109 production from the polyol pathway but did not alter glucose metabolism. Thus, it  
110 appeared that conversion from fructose to glucose is insignificant, and that once  
111 fructose is produced in cancer cells, its subsequent metabolism is independent of  
112 glucose metabolism. Fructose-specific metabolism is different from glucose  
113 metabolism in that it has fewer steps, and the pathway is not reversible<sup>10</sup>. Cancer  
114 cells commonly overexpress glucose transporters, such as SLC2A1/GLUT1 and  
115 SLC2A3/GLUT3, to take in a large amount of extracellular glucose to support their  
116 high rates of proliferation<sup>11</sup>. Glucose is known to be the preferred carbon source for  
117 the production of structural components necessary for cell growth and division.  
118 When cancer cells metabolize glucose to synthesize biomass, a massive amount of  
119 NADPH is generated as well<sup>7</sup>. Hence high glucose and high NADPH levels are  
120 commonly found in cancer cells. Interestingly, in this study, we found that the  
121 accumulation of intracellular glucose and NADPH in cancer cells facilitated the  
122 activation of the polyol pathway (Fig. 1h).

123 To determine whether the glucose level affects the activation of the polyol  
124 pathway, we compared the expressions of AKR1B1 and SORD in cancer cells  
125 cultured under different glucose levels. We found that glucose availability  
126 regulated the polyol pathway. We selected four different types of cancer cells with  
127 varying fructose production capabilities for this study. Under high glucose (25  
128 mM) concentrations, the cancer cells significantly increased their AKR1B1  
129 expression levels compared to those grown in low glucose (2.5 mM) (Fig. 1i). The  
130 response of SORD expression to different glucose concentrations varied in the four  
131 cancer cell lines (Extended Data Fig. 1h). This observation may also provide a

132 mechanistic explanation for the much-increased cancer risk in the diabetic patient  
133 population<sup>12</sup>. Increased blood glucose activates the polyol pathway, not only  
134 causing tissue damage due to increased production of sorbitol but also providing  
135 damaged cells with additional nutrient support to facilitate their malignant  
136 transformation.

137

### 138 **Fructose metabolism enhances glycolysis in cancer cells**

139 To investigate the role of fructose metabolism in cancer cells, we compared  
140 the AKR1B1 KO (the polyol pathway deficient) A549 cells with their wild-type  
141 counterparts (control) in the Seahorse Cell Glycolysis Stress test and Mito Stress  
142 test assays<sup>13</sup>. The assays showed drastically compromised glycolysis in the  
143 AKR1B1 KO cells (Fig. 2a) but no significant difference in mitochondrial  
144 functions (Fig. 2b) between the two cell lines. We then examined metabolites  
145 involved in glycolysis and mitochondrial respiration. Targeted metabolomics  
146 profiling showed that the glycolytic metabolites, such as serine<sup>14</sup>, pyruvate, and  
147 lactate, were significantly decreased in AKR1B1 KO cells (Fig. 2c-e and Extended  
148 Data Fig. 2a). Meanwhile, metabolites related to aerobic respiration, such as  
149 succinate, fumarate, malate, and aspartate<sup>15</sup> were slightly decreased or not  
150 significantly altered (Fig. 2f-i and Extended Data Fig. 2b). These results indicated  
151 that fructose metabolism promoted glycolysis, leading to enhanced amino-acid  
152 (Fig. 2c, f and Extended Data Fig. 2a, c) and pyruvate (Fig. 2d) production.  
153 Pyruvate was first provided to the TCA cycle in mitochondria (Fig. 2g-i), and after  
154 TCA metabolism reached the saturation point, the excess amount of pyruvate was  
155 converted to lactate (Fig. 2e). We observed similar metabolic phenotypes in  
156 AKR1B1 silenced CY790 cells (Extended Data Fig. 3a-i), the wild-type of which  
157 showed high fructose production capability close to that of A549 cells. Metabolic  
158 flux analysis showed that wild-type cells had a significantly faster pyruvate-

159 producing rate than the polyol pathway-deficient cells (Fig. 2j). The malate  
160 production curve showed a similar trend to pyruvate production (Fig. 2k),  
161 suggesting that fructose metabolism accelerated pyruvate production and rapidly  
162 fueled the TCA cycle. The lactate production, however, increased at a much slower  
163 rate than those of pyruvate and malate in the wild-type cells (Fig. 2l), suggesting  
164 that after the TCA-cycle reached its saturation point, additional pyruvate derived  
165 from fructose metabolism was then converted to lactate. Such metabolic outcome  
166 is the phenomenon that was observed by Dr. Otto Warburg and perceived to be  
167 “aerobic glycolysis” of glucose metabolism in cancer cells about 100 years ago.

168 To evaluate the contribution of fructose metabolism to the Warburg effect, we  
169 knocked out or silenced the Hexokinase-1 (HK1) and Hexokinase-2 (HK2) genes  
170 from A549 cells (Extended Data Fig.3j, k). The hexokinases phosphorylate glucose  
171 to G-6-P (Fig. 1g) and start the glycolysis. Both the hexokinases HK1 and HK2 are  
172 expressed in cancer cells. Knock out of HK1 and HK2 effectively blocked glucose  
173 metabolism in A549 cells<sup>16</sup>. As described above, the A549 cells could process  
174 about 50% of glucose to fructose, i.e., the amounts of glucose and fructose are  
175 almost equal in this cell line. Blockage of glucose or fructose metabolisms in this  
176 cell line should thus be comparable. Interestingly, the amount of ATP was  
177 drastically depleted in both glucose metabolism deficient and fructose metabolism  
178 deficient cells at similar levels (Fig. 2m and Extended Data Fig. 3l). We then  
179 compared the extracellular acidification rates (ECAR), a symbolic index of the  
180 Warburg effect, in the AKR1B1 KO and HK KO (or silenced) cells. The data  
181 showed that blockage of glucose or fructose metabolism resulted in a similar level  
182 of decrease in acidification in the A549 cancer cells (Fig. 2n and Extended Data  
183 Fig. 3m).

184 The result implied that glucose and fructose were equally capable of fueling  
185 aerobic glycolysis. As we know, glucose metabolism is a self-limited process with

186 negative regulation of PFK and HK by glycolysis products such as ATP and G-6-  
187 P<sup>17</sup>. To verify whether metabolites from glucose metabolism affected fructose  
188 conversion, we further tested the AKR1B1 and SORD expression in glucose  
189 metabolism deficient cells. The results showed that compared to control cells,  
190 AKR1B1 and SORD expressions did not significantly change in HK KO cells (Fig.  
191 2o, p and Extended Data Fig. 3n, o). These implied that fructose metabolism was  
192 relatively independent of glucose metabolism.

193 As a tightly controlled process, glucose metabolism will reach a dynamic  
194 balance to supply limited amount of materials and energy for regular cell  
195 metabolism. But in highly proliferating cancer cells, this is not sufficient. Under  
196 such circumstances, the fructose metabolism will bypass these control elements of  
197 classic glycolysis and keep providing glyceraldehyde 3-phosphate (GA3P) into the  
198 later glycolysis stage (Fig. 2q). The additional GA3P from fructose metabolism  
199 will not predominantly fuel the TCA cycle, which is saturated through glucose  
200 metabolism. Instead, fructose metabolism will enhance glycolysis by increasing the  
201 biomass synthesis and production of lactic acid. In other words, the Warburg effect  
202 or aerobic glycolysis in cancer cells is achieved by a combined glucose and  
203 fructose metabolism.

204  
205 **Cancer cells export endogenous fructose through the sugar transporter**  
206 **SLC2A8/GLUT8.**

207 Cancer cells absorb extracellular fructose predominantly through the fructose  
208 transporter, SLC2A5/GLUT5. Interestingly, we detected <sup>13</sup>C-fructose in culture  
209 supernatants of all cell lines incubated with <sup>13</sup>C-glucose, except CY790, a  
210 mesothelioma cell line (Fig. 3a). This finding suggests that fructose produced in  
211 cancer cells can be transported to the extracellular environment. We compared the  
212 two mesothelioma cell lines, CY790 and CY289, one with a trace amount of



213 fructose and the other with high concentration fructose (7  $\mu$ M vs. 894  $\mu$ M) found in  
214 the supernatant, respectively. The SLC2A5/GLUT5 and SLC2A8/GLUT8  
215 expression levels were distinct between the two cell lines (Fig. 3b). We detected  
216 SLC2A8 expression in CY289 but not in CY790 cells, suggesting that the  
217 difference in SLC2A8 expression between the two cell lines may be responsible for  
218 the different fructose concentrations in supernatants. We then knocked out the  
219 expression of SLC2A8 in A549 cells using a CRISPR/Cas9 technique (Fig. 3c) as  
220 this cell line demonstrated strong fructose-exporting ability with the highest  
221 concentration of fructose in the culture supernatant among 14 cell lines (Fig. 3a).  
222 The A549 SLC2A8 knockout cells showed significantly higher intracellular  
223 fructose levels and lower extracellular fructose levels compared with the A549  
224 wild-type (Fig. 3d), indicating that fructose export was effectively shut down.  
225 SLC2A8 is widely expressed in almost all tested cancer cell lines, as shown in Fig.  
226 3e, similar to the expression of the two genes encoding AKR1B1 and SORD in the  
227 polyol pathway. This finding was also validated by the TCGA human cancer  
228 database (Fig. 3f), which reported that SLC2A8 was expressed across the spectrum  
229 of all types of human cancer.

230 This novel finding led us to hypothesize that fructose-producing cancer cells  
231 can make this additional energy source available to other cells in the tumor  
232 microenvironment. Generally, the nutrient supply is compromised inside a fast-  
233 growing tumor mass. However, with the polyol pathway and SLC2A8-mediated  
234 fructose exchange, it may be possible that the cancer cells in the outermost layer of  
235 the tumor can access circulating glucose and convert it to fructose and then export  
236 it into the tumor microenvironment for utilization by other cancer cells in the inner  
237 layer of the tumor cell mass (Fig. 3g).

238

## 239 **Fructose enhances cancer cell proliferation and malignancy**

240 To determine how fructose metabolism benefits cancer cells, we measured the  
241 cell responses to fructose in AKR1B1 KO cells and also cells overexpressed with  
242 AKR1B1. The AKR1B1 KO cells showed a decrease in malignant phenotypes *in*  
243 *vitro* and *in vivo*, while cells overexpressed in AKR1B1, on the other hand,  
244 demonstrated significantly increased rates of growth and tumor development in a  
245 mouse model (Fig. 4, Extended Data Fig. 4-5). To study the role of fructose  
246 metabolism via the polyol pathway in cancer cell growth, we generated AKR1B1  
247 KO (Fig. 1e and Extended Data Fig. 1e) and AKR1B1 overexpressed cancer cell  
248 lines (Extended Data Fig. 4a, b) using CRISPR/Cas9 knockout and  
249 CRISPRa/Cas9-VPR overexpression technology. In the original AKR1B1 high  
250 expression cancer cells, such as A549 and CY790 cells, the CRISPRa/Cas9-VPR  
251 had a negligible effect on the AKR1B1 expression. In U87 and BxPC3 cells with  
252 moderate expression levels of AKR1B1, however, fructose production was  
253 increased by 3-5 fold with overexpression of AKR1B1 (Extended Data Fig. 4b).

254 We tested the migration and invasion ability of AKR1B1 KO A549 cells or  
255 AKR1B1 silenced CY790 cells. The knockout or silencing of AKR1B1 resulted in  
256 compromised cell motion in both the wound healing assay (Fig. 4a and Extended  
257 Data Fig. 5a) and transwell assay (Fig.4b and Extended Data Fig. 5b), compared  
258 with wild-type control cells. *In vitro* cell proliferation tests showed that the growth  
259 rate of AKR1B1 KO or silenced cancer cells was highly suppressed (Fig. 4c,  
260 Extended Data Fig. 4c, and Extended Data Fig. 5c). On the other hand,  
261 overexpression of AKR1B1 not only increased fructose production but also  
262 significantly increased tumor growth rate (right panels of Fig. 4c and Extended  
263 Data Fig. 4c). We then investigated the effect of the polyol pathway on cancer  
264 proliferation *in vivo*. We injected  $0.1 \times 10^6$  wild-type or gene manipulated  
265 (AKR1B1 KO, overexpression, or AKR1B1 silenced) cancer cells, which

266 constitutively expressed luciferase, in nude mice at day 0, respectively. Luciferase  
267 activity of each tumor increased with tumor mass. Every three days, we measured  
268 the luminescence intensity of tumors by D-luciferin injection. Compared with  
269 wild-type cells, AKR1B1 compromised (KO or silenced) cancer cells showed  
270 significantly reduced tumor growth rates (Fig. 4d, Extended Data Fig. 4d, 5d, and  
271 5e) while AKR1B1 overexpression promoted cancer cell growth (Fig. 4e, and  
272 Extended Data Fig. 4e). These results confirmed that fructose metabolism  
273 enhanced cancer malignancy.

274  
275

276 Our study identified the intra- and extracellular polyol pathways to be a  
277 crucial fructose-producing mechanism that is important for cancer-mediated  
278 metabolic reprogramming leading to enhanced glycolysis, cell proliferation, and  
279 malignancy. Compared with glucose, fructose metabolism results in accelerated  
280 glycolysis and an increased amount of ATP, demonstrating a typical phenotype of  
281 increased glycolytic flux. We suspect that cancer metabolism involving the intra-  
282 /extracellular polyol pathway-derived fructose may constitute an essential part of  
283 the Warburg effect. Under the aerobic condition, the abundant ATP from the TCA  
284 cycle limits the glycolytic rate. Almost all of the glycolysis production will be  
285 exhausted by the TCA cycle with nothing remaining to convert to significant  
286 amounts of lactate. In cancers, uptake of large amount of glucose through  
287 overexpressed GLUT1 and/or GLUT3 activates the polyol pathway and fructose  
288 metabolism, overcoming the limitations of glycolysis and producing excess  
289 amount of glycolytic metabolites for biomass and lactate production. It results in  
290 the acidification of cancer cells under aerobic conditions. Additionally, there is a  
291 selective advantage for cancer cells to utilize fructose to support their rapid  
292 proliferation because fructose lacks cellular metabolic homeostasis machinery,

293 unlike glucose, which is strictly regulated by either insulin or glucagon. As the  
294 polyol pathway is not cancer-specific (comparable levels of AKR1B1 and SORD  
295 were found in normal epithelial cell lines, Extended Data Fig. 1a, b), we  
296 hypothesize that it profoundly impacts all fast-growing cells, including activated  
297 immune cells, germinal cells, and stem cells.

298 We also found in this study that high glucose levels stimulated the expression  
299 of AKR1B1. Therefore, it is not difficult to understand that the polyol pathway is  
300 activated to lower the blood glucose levels in diabetic patients and, thus,  
301 implicated in diabetic complications. The intermediate molecule in the polyol  
302 pathway, sorbitol, cannot cross cell membranes and, when it accumulates from  
303 increased cellular production, causes microvascular damage to the retina, kidney,  
304 and nerves <sup>6</sup>. Given the recent findings that increased fructose level promotes  
305 cancer malignancy, the polyol pathway's activation may be responsible for the  
306 increased risk of cancer development in the diabetic population.

307 As the polyol pathway is not essential to energy metabolism in normal cells  
308 via the glycolysis pathway, inhibition of AKR1B1 activity may represent a novel,  
309 effective, and safe strategy for cancer therapy and preventive cancer treatments for  
310 diabetic patients. Currently, several AKR1B1 inhibitors are undergoing clinical  
311 trials to treat diabetic complications<sup>9,21</sup>. These compounds may have the potential  
312 to be useful as direct treatments for cancer and preventive cancer treatments for  
313 diabetic patients.

314 To summarize, the cancer cells utilize the polyol pathway to produce fructose  
315 and gain more energy and biomass from fructose metabolism than the equivalent  
316 amount of glucose. Fructose metabolism in cancer cells produces increased amount  
317 of lactate and metabolic intermediates for biomass, demonstrating a typical  
318 glycolytic phenotype and providing an essential contribution to the Warburg effect.

319

## 320 **Methods**

### 321 **Cell Culture**

322 A549 (lung carcinoma), EKVX (lung adenocarcinoma), SW-620 (colorectal  
323 adenocarcinoma), HCT116 (colorectal carcinoma), U251 (malignant  
324 glioblastoma), MCF7 (breast adenocarcinoma), and MDA-MB-231 (breast  
325 adenocarcinoma) cells were obtained from NCI-60 cell storage of the University of  
326 Hawaii Cancer Center. BxPC3 (pancreas adenocarcinoma), PSN1 (pancreas  
327 adenocarcinoma), and U87 MG (malignant glioblastoma) cells were ordered from  
328 Sigma-Aldrich. HPDE6c7 (pancreatic duct epithelial cell), and MCF-10A (breast  
329 fibrocystic disease) cells were ordered from American Type Culture Collection  
330 (ATCC). CY289 and CY790 (mesothelioma) cells were gifts from Dr. Carbrone  
331 and Dr. Yang's lab. All cell lines were adapted to culture and maintained in  
332 DMEM (Thermo Fisher Scientific) with 10% FBS under 37°C and 5% CO<sub>2</sub>.

333

### 334 **Gene Knock Out and Activation by CRISPR/Cas9**

335 We used Dharmacon Edit-R All-in-one Lentiviral and Edit-R CRISPRa Lentiviral  
336 systems to create gene knock out (KO) and gene overexpression cell lines. The  
337 sgRNA sequences are as follows: CGACCTGAAGCTGGACTACC  
338 (GSGH11935-247543511, for Human AKR1B1 KO, Dharmacon),  
339 GCCGCGGCGGCCTTCCCC AA (GSGH11887-247076986, for Human  
340 AKR1B1 overexpression, Dharmacon), GACAACCTATACCTGCCAGGT  
341 (GSGH11935-247493945, for Human SLC2A8 KO, Dharmacon),  
342 GTTCAAGATGGCGCCCAGTG (GSGH11935-247518767, for Human HK1,  
343 Dharmacon), TAAGCGGTTCCGCAAGGAGA (CS-HCP001744-LvSG03-1-B,  
344 for Human HK2, GeneCopoeia). The shRNA sequences are as follows:  
345 GGTGGAGATGATCTTAAACAA (HSH005861-LVRU6GP, for Human  
346 AKR1B1, GeneCopoeia), CAATGCCTGCTACATGGAGGA (CS-HSH1530L-

347 LVRU6GP-01, for Human HKs, GeneCopoeia). Lentivirus was packed using the  
348 Dharmacon Trans-Lentiviral ORF Packaging Kit with Calcium Phosphate  
349 (TLP5916), and cells were infected to create stable cell lines according to the  
350 manufacturer's instruction.

351

## 352 **Western Blotting**

353 Immunoblotting was performed as previously described <sup>2</sup>. Briefly, the transfer-  
354 ready membrane was blocked 1 hour in TBS-T containing 5% nonfat milk at room  
355 temperature, followed by incubation with primary antibody at 4°C overnight. The  
356 anti-AKR1B1 antibody (Abcam, ab62795), anti-SORD antibody (Abcam,  
357 ab185705), anti-SLC2A8 antibody (LifeSpan BioSciences, LS-C757596), and anti-  
358 Vinculin antibody (Cell Signaling Technology, E1E9V) were used at 1:1000  
359 dilution respectively. The secondary antibody was horseradish peroxidase-  
360 conjugated anti-rabbit antibody used at a 1:5,000 dilution. Vinculin was used as a  
361 protein loading control.

362

## 363 **RT-PCR**

364 RNA extraction and reverse transcription were performed by TRIzol (Thermo  
365 Fisher Scientific) and iScript™ cDNA Synthesis Kit (Bio-Rad Laboratories)  
366 according to the manufacturer's instructions. PCR primer sequences were as  
367 follows. Primers for AKR1B1 PCR: TACTCAGCTACAACAGGAACTG,  
368 AGGCAAGAAACACAG GTATAGG, probe:  
369 TTGTTGAGCTGTACCTCCCACAAGG; Primers for SORD PCR:  
370 ACTCCAGAGCCAAAAGAGC , CATCCTCAGCAAGACCTCAT, probe:  
371 AGGATAGTTCTCCAGGCGCAAGTC; Primers for SLC2A8 PCR: GCCAAG  
372 TTCAAGGACAGCA, ATGACCACACCTGACAAGAC, probe: ATGATGAGA  
373 GCCGCCACAGCT; Primers for ACTB PCR: GCGAGAAGATGACCCAGAT,

374 CCAGTGGTACGGCCAGA, probe: CCATGTACGTTGCTATCCAGGCTGT;  
375 Primers for SLC2A5 PCR: CAAGCATGGAGCAACAGGAT, GAAGGATGA  
376 CCCAAAGGCA, probe: AGCATGAAGGAAGGGAGGCTGAC; Primers for  
377 SLC2A2 PCR: CTGGAAGAAGCATATCAGGACT, GCTGATGAAAAGTGC  
378 CAAGTG, probe: CTGAGAGCGGTTGGAGCAATTTTCAC; Primers for  
379 SLC2A7 PCR: CCGTCTCCATGTTTCCTCTG, CCACTTTGCTGACTCCCATC,  
380 probe: CCCACGAGCAATGACCCCAACA; Primers for SLC2A11 PCR:  
381 GTCAGCAGC AATCCTGTTTG, GTACATGGGCTGGATGTTCA, probe:  
382 AGCAGTCTTCCC AGCATGATCATCTC. We performed real-time PCR with  
383 the iTaq™ Universal Probes Supermix (Bio-Rad Laboratories) by Lightcycle 480  
384 (Roche Molecular Systems).

385

### 386 **Seahorse Extracellular Flux Assays**

387 Gene-modified cancer cells were maintained in serum-free HuMEC Ready  
388 Medium before the assay. The Seahorse XF Glycolysis Stress Test Kit and Cell  
389 Mito Stress Test Kit (Agilent) were used to measuring cell glycolysis and  
390 mitochondrial function, respectively, using the Agilent Seahorse XF96 analyzer<sup>13</sup>  
391 following the manufacturer's instructions.

392

### 393 **Measurements of AKR1B1 and SORD in human serum**

394 Peripheral blood specimens from 10 healthy donors, 16 lung cancer, 8 colorectal  
395 cancer, and 22 multiple myeloma patients were obtained with consent at the  
396 Second Xiangya Hospital of Central South University, Blood Diseases Hospital of  
397 Chinese Academy of Medical Science & Peking Union Medical College, Hunan  
398 Cancer Hospital, Hunan Provincial People's Hospital and the Second People's  
399 Hospital of Hunan Province during the period 2016-2020. Serum was prepared  
400 from peripheral blood. The concentrations of AKR1B1 and SORD in serum were

401 measured using Human Aldose Reductase (AR) ELISA Kit (Catalog No.  
402 ml024614, Mlbio, Shanghai, China) and Human Sorbitol Dehydrogenase (SORD)  
403 ELISA Kit (KL-SORD-Hu, KALANG, Shanghai, China) according to their  
404 manufactory instructions, respectively.

405

### 406 **Cell Proliferation Assay**

407 All gene-modified cancer cells were first adapted to HuMEC Ready Medium  
408 (Thermo Fisher Scientific) and then plated at 1000 cells/well in HuMEC Ready  
409 Medium followed by the culture at 37°C under 5% CO<sub>2</sub>. A cell proliferation assay  
410 was performed by using the Cell Counting Kit-8 (CCK-8) (Dojindo Molecular  
411 Technologies) after the indicated time point of culture. 10 µL of the CCK8 dye was  
412 added to each plate well and then incubated for 1 hour at 37°C under 5% CO<sub>2</sub>. The  
413 optical density (OD) was then read at 450 nm directly using a microplate reader.

414

### 415 ***In vitro* Cell Migration and Invasion Assays**

416 The ibidi Culture-Insert 4 Well in µ-Dish (ibidi, 80466) was used for the wound  
417 healing assay, and the Corning BioCoat Matrigel Invasion Chamber (Corning,  
418 354480) was used for the transwell assay according to the manufacturer's  
419 instructions. Gene-modified cancer cells were seeded in HuMEC Ready Medium  
420 and cultured at 37°C under 5% CO<sub>2</sub>. The images of wound healing data were  
421 analyzed by NIH ImageJ.

422

### 423 **Xenograft Formation**

424 Nude mice (4-6 weeks old) from Charles River Laboratory were injected right and  
425 left sides respectively with 200 µL Matrigel (Corning) slurry (prepared at a 1:1  
426 ratio with 1X PBS) containing 0.1 million control or gene manipulated cancer cells  
427 that constitutively expressed luciferase (AMS Biotechnology Limited). Luciferase



428 activity of each tumor increased with tumor mass by the time. Every three days, we  
429 measured the luminance intensity of tumors by intraperitoneal injection of 50  
430 mg/mouse D-luciferin (Thermo Fisher Scientific) into anesthetized mice, followed  
431 by the detection of live images using the Xenogen IVIS (PerkinElmer) at 30 min  
432 post-injection.

433

### 434 **Chemicals and reagents**

435 Diisopropylethylamine (DIPEA), 3-nitrophenylhydrazine (3-NPH)·HCl, 1-ethyl-3-  
436 (3-dimethylaminopropyl) carbodiimide (EDC) HCl, and pyridine (HPLC grade),  
437 glucose, fructose, glucose 6-phosphate, fructose 6-phosphate, glucose 1-  
438 phosphate, fructose 1-phosphate, fructose 1,6-bisphosphate, glyceraldehyde 3-  
439 phosphate, dihydroxyacetone phosphate, 2-phosphoglycerate, pyruvate, 6-  
440 phosphogluconate, ribulose 5-phosphate, ribose 5-phosphate, sedoheptulose 7-  
441 phosphate, erythrose 4-phosphate, citrate, isocitrate, succinate, fumarate, malate,  
442 lactate,  $\alpha$ -ketoglutarate, oxaloacetate, serine, glutamate, glutamine, aspartate,  
443 hydroxyruvate were purchased from Sigma-Aldrich (St Louis, MO). Optima LC-  
444 MS grade water, methanol (MeOH), isopropanol, formic acid and acetonitrile  
445 (ACN) were purchased from Thermo Fisher Scientific (Waltham, MA). [13C6]-  
446 glucose and [13C6]-fructose D-Glucose U-13C6 and D-Fructose U-13C6 were  
447 purchased from Cambridge Isotope Laboratories (Tewksbury, MA). FBS:  
448 Premium Grade Fetal Bovine Serum (VWR, 97068-085), Performance Plus Fe tal  
449 Bovine Serum (gibco, 16000-036), Charcoal Stripped Fetal Bovine Serum (gibco,  
450 A33821-01), Dialyzed Fetal Bovine Serum (gbico, a33820-01). Heat Inactive was  
451 performed under 56 °C for 30 min. DMEM (gibco, 11966-025). Epalrestat  
452 (Cayman Chemical, 15214). 13C-Glucose (Cambridge Isotope Laboratories, CLM-  
453 1396). Amino Acids: L-Arginine, Hydrochloride (MilliporeSigma, 181003),  
454 Histidine hydrochloride (MilliporeSigma, H0755000), L-Lysine (MilliporeSigma,

455 62840), L-Phenylalanine (MilliporeSigma, P5482), L-Valine (MilliporeSigma,  
456 V0513). PBS (gibco, 14190-144).

457

### 458 **Standard solutions**

459 Each standard compound was accurately weighed and dissolved in water to prepare  
460 stock solutions with a final concentration of 20 mM for each standard. The final  
461 working standard solution mix contained 28 metabolites (detailed in Table 1) with  
462 a final concentration of 400  $\mu$ M/metabolite. For quantification, a 7-point  
463 calibration curve was constructed by using a series of 1:2 serial dilutions from the  
464 highest concentration of calibration mixture with water. The stock solutions were  
465 kept at -20 °C.

466

### 467 **Stable isotope tracer analysis and metabolite quantification**

468 Cell culture, labeling, and sample collection: All tested cells were cultured in  
469 DMEM containing 10% FBS under 37 ° C/ 5% CO<sub>2</sub> before treatment. After  
470 washing with PBS, all tested cells were treated with DMEM containing 25mM D-  
471 Glucose U-13C6 (Cambridge Isotope Laboratories (Tewksbury, MA) ) and 2%  
472 BSA under 37 ° C/5% CO<sub>2</sub> for 24 hours or indicated time points for flux rate tests.  
473 <sup>13</sup>C labeled metabolites in medium and cell pellets were identified and quantified  
474 by using UPLC- QTOF- MS.

475 UPLC-QTOF-MS analysis: Cells were washed twice with phosphate-buffered  
476 saline (Thermo Fisher Scientific) (pH 7.4) and then carefully scraped into 1.5 mL  
477 safe lock centrifuge tubes with 10 mg of beads (0.5 mm). Metabolites were  
478 extracted by adding 0.5 mL of 50% MeOH (-20°C), followed by homogenization  
479 for 3 min using a Bullet Blender Tissue Homogenizer (Next Advance, Inc., Averill  
480 Park, NY) and centrifugation at 13, 500 g for 10 min at 4°C.

481 The resulting 50  $\mu$ L of supernatant and also cell culture medium samples were  
482 transferred to 1.5 mL tube and mixed with 10  $\mu$ L of 200 mM 3-NPH solution and  
483 10  $\mu$ L of the mixed 96 mM of EDC/pyridine methanolic solution. Derivatization  
484 was conducted by incubation at 30°C for 1 h before evaporation to dryness under  
485 nitrogen. 400  $\mu$ L of 50% aqueous methanol was used to re-suspend the samples.  
486 The supernatants were used for UPLC-QTOF-MS analysis according to previous  
487 reports with minor modifications<sup>22,23</sup>.

488

### 489 **Cell Metabolomics Analysis**

490 Cell culture and sample collection: Cells were adapted to HuMEC Ready Medium  
491 and fed by fresh medium 24h before harvest for metabolomics assay. To perform  
492 the metabolite flux test, cells were starved for 16 hours in DMEM containing 2%  
493 BSA without glucose before feeding them with the HuMEC Ready Medium. Cells  
494 were then harvested cells at indicated time points.

495 Cell Metabolite extraction and derivatization: Cells were washed twice with  
496 phosphate-buffered saline (Mediatech, Manassas, VA) (1 mM pH 7.4) and then  
497 carefully scraped into 1.5 mL safe lock centrifuge tubes with containing 10 mg of  
498 beads (0.5 mm). Metabolites were extracted by adding 0.5 mL of 50% MeOH (-  
499 20°C), followed by homogenization for 3 min using a Bullet Blender Tissue  
500 Homogenizer (Next Advance, Inc., Averill Park, NY) and centrifugation at 13, 500  
501 g for 10 min at 4°C. Derivatization was performed according to the method of Han  
502 et al.<sup>24</sup> with minor modifications. 50  $\mu$ L of supernatant or standard was transferred  
503 to a 1.5 mL tube and mixed with 10  $\mu$ L of 200 mM 3-NPH solution, and 10  $\mu$ L of  
504 the mixed 96 mM of EDC/pyridine methanolic solution. Derivatization was  
505 conducted by incubation at 30°C for 1 h before evaporation to dryness under  
506 nitrogen. 400  $\mu$ L of 50% aqueous methanol was used to re-suspend the samples.  
507 The derivatives were analyzed via UPLC-QTOF-MS.

508 Cell extracts analysis by ultra-performance liquid chromatography/xevo G2  
509 quadrupole time-of-flight tandem mass spectrometry: The metabolites in culture  
510 medium and cell pellets were analyzed using the ACQUITY UPLC I-Class System  
511 coupled with a Xevo G2-S QTOF (ACQUITY UPLC- Xevo G2 QTOF, Waters  
512 Corp., Milford, MA). Chromatographic separation of phosphate and carboxylate  
513 was performed on the ACQUITY UPLC with a conditioned autosampler at 10°C,  
514 using an Acquity BEH C18 column (100 mm × 2.1 mm i.d., 1.7 µm particle size)  
515 (Waters, Milford, MA, USA). The column temperature was maintained at 40°C.  
516 The mobile phase consisting of water with 5 mM DIPEA in water (solvent A) and  
517 acetonitrile/isopropanol=7/3 (solvent B) was pumped at a flow rate of 0.3 mL/ min.  
518 The gradient elution program was as follows: 0–8 min, 1-20% B; 8–16 min, 20–  
519 98% B; 16.0–16.1 min, 98–1% B; 16.1–18.0 min, 1% B for equilibration of the  
520 column. The injection volume was 5 µL. The Xevo G2 QTOF mass spectrometer  
521 was used in negative ESI mode for data acquisition using UPLC/MS. Typical  
522 source conditions were as follows: capillary voltage, 3.0 kV; sample cone, 40 V;  
523 source temperature, 120 °C; desolvation temperature 450 °C; cone gas flow rate 50  
524 L/h; desolvation gas (N<sub>2</sub>) flow rate 900 L/h. All analyses were performed using the  
525 lockspray, which ensured accuracy and reproducibility. Leucine–enkephalin (5 ng  
526 /mL) was used as the lockmass generating a reference ion in positive mode at m/z  
527 554.2615 and was introduced by a lockspray at 10 µL /min for accurate mass  
528 acquisition. Data acquisition was achieved using MS. The injection volume was 5  
529 µL.

530 As shown in Extended Data Fig.6, a total of 28 phosphate and carboxylate  
531 metabolites were detected by UPLC-QTOF-MS. Extended Data Table 1 showed  
532 the identification of metabolites in cells using UPLC-QTOF -MS.

533

### 534 **Statistics and reproducibility**

535 Statistical analyses were performed using GraphPad PRISM version 8.0 software.  
536 A two-tailed t-test assessed the statistical significance of data unless noted  
537 otherwise, and the  $p > 0.05$  was considered not significant (ns). Data represent  
538 mean  $\pm$  sem as indicated in figure legends. All experiments for which data are  
539 displayed as a dot plot, all values from each repeat of the experiment are displayed  
540 together. For all experiments shown, similar results were obtained from at least  
541 three biologically independent experiments.

542

543 **Author contributions** W.J. conceptualized the study. W.J. and B.H. designed the  
544 studies. B.H., M.W. and J.Z. performed and analyzed biological experiments. B.H.,  
545 G.X. and L.W. performed and analyzed metabolomics experiments. W.J. and B.H.  
546 wrote the manuscript. W. C., C. R., W.Z., J.Z. and H.Y. edited the manuscript.

547

548 **Competing interests** The authors declare no competing interests.

549 **Correspondence and requests for materials** should be addressed to W.J.

550

551

## 552 **References**

- 553 1 Goncalves, M. D. *et al.* High-fructose corn syrup enhances intestinal tumor growth in  
554 mice. *Science* **363**, 1345-1349, doi:10.1126/science.aat8515 (2019).
- 555 2 Chen, W. L. *et al.* Enhanced Fructose Utilization Mediated by SLC2A5 Is a Unique  
556 Metabolic Feature of Acute Myeloid Leukemia with Therapeutic Potential. *Cancer Cell*  
557 **30**, 779-791, doi:10.1016/j.ccell.2016.09.006 (2016).
- 558 3 Chen, W. L. *et al.* GLUT5-mediated fructose utilization drives lung cancer growth by  
559 stimulating fatty acid synthesis and AMPK/mTORC1 signaling. *JCI Insight* **5**,  
560 doi:10.1172/jci.insight.131596 (2020).
- 561 4 Krause, N. & Wegner, A. Fructose Metabolism in Cancer. *Cells* **9**,  
562 doi:10.3390/cells9122635 (2020).
- 563 5 Jang, C. *et al.* The Small Intestine Converts Dietary Fructose into Glucose and Organic  
564 Acids. *Cell Metab* **27**, 351-361 e353, doi:10.1016/j.cmet.2017.12.016 (2018).

- 565 6 Yabe-Nishimura, C. Aldose reductase in glucose toxicity: a potential target for the  
566 prevention of diabetic complications. *Pharmacol Rev* **50**, 21-33 (1998).
- 567 7 Vander Heiden, M. G., Cantley, L. C. & Thompson, C. B. Understanding the Warburg  
568 effect: the metabolic requirements of cell proliferation. *Science* **324**, 1029-1033,  
569 doi:10.1126/science.1160809 (2009).
- 570 8 Abdel-Haleem, A. M. *et al.* The Emerging Facets of Non-Cancerous Warburg Effect.  
571 *Front Endocrinol (Lausanne)* **8**, 279, doi:10.3389/fendo.2017.00279 (2017).
- 572 9 Goto, Y., Hotta, N., Shigeta, Y., Sakamoto, N. & Kikkawa, R. Effects of an aldose reductase  
573 inhibitor, epalrestat, on diabetic neuropathy. Clinical benefit and indication for the  
574 drug assessed from the results of a placebo-controlled double-blind study. *Biomed*  
575 *Pharmacother* **49**, 269-277, doi:10.1016/0753-3322(96)82642-4 (1995).
- 576 10 Sun, S. Z. & Empie, M. W. Fructose metabolism in humans - what isotopic tracer studies  
577 tell us. *Nutr Metab (Lond)* **9**, 89, doi:10.1186/1743-7075-9-89 (2012).
- 578 11 Krzeslak, A. *et al.* Expression of GLUT1 and GLUT3 glucose transporters in endometrial  
579 and breast cancers. *Pathol Oncol Res* **18**, 721-728, doi:10.1007/s12253-012-9500-5  
580 (2012).
- 581 12 Ohkuma, T., Peters, S. A. E. & Woodward, M. Sex differences in the association between  
582 diabetes and cancer: a systematic review and meta-analysis of 121 cohorts including  
583 20 million individuals and one million events. *Diabetologia* **61**, 2140-2154,  
584 doi:10.1007/s00125-018-4664-5 (2018).
- 585 13 Bononi, A. *et al.* BAP1 regulates IP3R3-mediated Ca(2+) flux to mitochondria  
586 suppressing cell transformation. *Nature* **546**, 549-553, doi:10.1038/nature22798  
587 (2017).
- 588 14 Amelio, I., Cutruzzola, F., Antonov, A., Agostini, M. & Melino, G. Serine and glycine  
589 metabolism in cancer. *Trends Biochem Sci* **39**, 191-198, doi:10.1016/j.tibs.2014.02.004  
590 (2014).
- 591 15 Sullivan, L. B. *et al.* Supporting Aspartate Biosynthesis Is an Essential Function of  
592 Respiration in Proliferating Cells. *Cell* **162**, 552-563, doi:10.1016/j.cell.2015.07.017  
593 (2015).
- 594 16 Xu, S. *et al.* Hexokinase 2 is targetable for HK1 negative, HK2 positive tumors from a  
595 wide variety of tissues of origin. *J Nucl Med*, doi:10.2967/jnumed.118.212365 (2018).
- 596 17 Jeremy M Berg, J. L. T., and Lubert Stryer. in *Biochemistry The Glycolytic Pathway Is*  
597 *Tightly Controlled*. Ch. 16.2, (W H Freeman, 2002).
- 598 18 Debosch, B. J., Chen, Z., Saben, J. L., Finck, B. N. & Moley, K. H. Glucose transporter 8  
599 (GLUT8) mediates fructose-induced de novo lipogenesis and macrosteatosis. *J Biol*  
600 *Chem* **289**, 10989-10998, doi:10.1074/jbc.M113.527002 (2014).
- 601 19 Manolescu, A., Salas-Burgos, A. M., Fischbarg, J. & Cheeseman, C. I. Identification of a  
602 hydrophobic residue as a key determinant of fructose transport by the facilitative  
603 hexose transporter SLC2A7 (GLUT7). *J Biol Chem* **280**, 42978-42983,  
604 doi:10.1074/jbc.M508678200 (2005).
- 605 20 Scheepers, A. *et al.* Characterization of the human SLC2A11 (GLUT11) gene: alternative  
606 promoter usage, function, expression, and subcellular distribution of three isoforms,  
607 and lack of mouse orthologue. *Mol Membr Biol* **22**, 339-351,  
608 doi:10.1080/09687860500166143 (2005).
- 609 21 Quattrini, L. & La Motta, C. Aldose reductase inhibitors: 2013-present. *Expert Opin Ther*  
610 *Pat* **29**, 199-213, doi:10.1080/13543776.2019.1582646 (2019).

- 611 22 Bononi, A. *et al.* Germline BAP1 mutations induce a Warburg effect. *Cell Death Differ*  
612 **24**, 1694-1704, doi:10.1038/cdd.2017.95 (2017).
- 613 23 Paglia, G. *et al.* Monitoring metabolites consumption and secretion in cultured cells  
614 using ultra-performance liquid chromatography quadrupole-time of flight mass  
615 spectrometry (UPLC-Q-ToF-MS). *Anal Bioanal Chem* **402**, 1183-1198,  
616 doi:10.1007/s00216-011-5556-4 (2012).
- 617 24 Han, J., Lin, K., Sequria, C., Yang, J. & Borchers, C. H. Quantitation of low molecular  
618 weight sugars by chemical derivatization-liquid chromatography/multiple reaction  
619 monitoring/mass spectrometry. *Electrophoresis* **37**, 1851-1860,  
620 doi:10.1002/elps.201600150 (2016).  
621  
622
- 623  
624

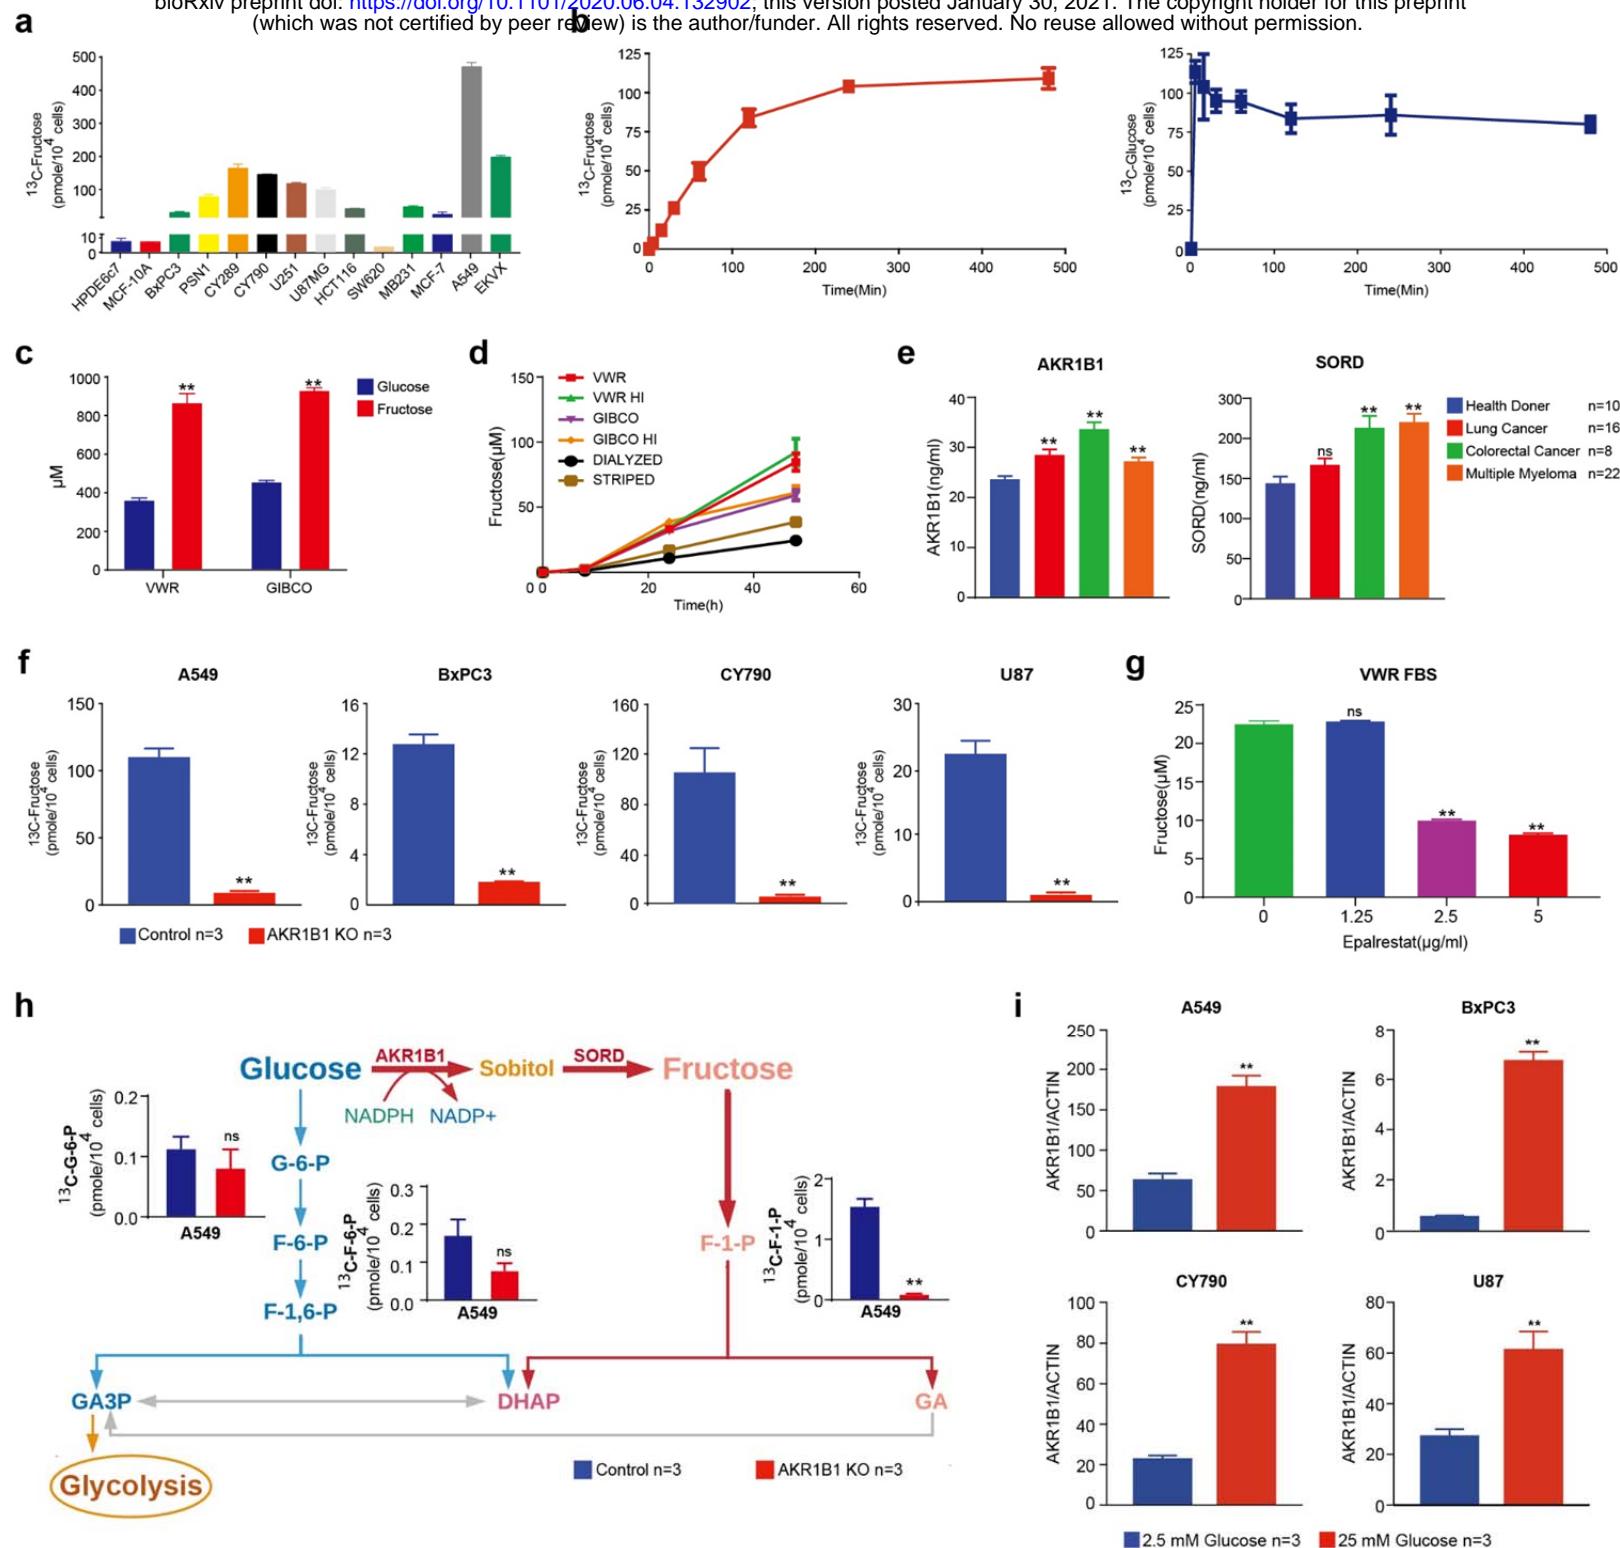

625 **Fig.1. Cancer cells produce high concentrations of fructose**

626 (a) HPDE6C7 and MCF-10A cells are considered normal cells controls. Along with these  
 627 controls, we tested a wide array of different cancer cell lines using  $^{13}\text{C}$  labeled metabolic flux  
 628 analysis. From these data, it was seen that although most of the cells affected the conversion of  
 629 glucose to fructose, there was variability in how much fructose was produced. Notably, A549  
 630 cells produced the most fructose. (b) Based on the results in Fig. 1a, we tested the rate of



631 fructose production in A549 cells. The red line represents intracellular  $^{13}\text{C}$ -fructose production,  
632 and the blue line represents the intracellular  $^{13}\text{C}$ -glucose level. **(c)** The concentration of glucose  
633 and fructose in two major commercial FBSs. **(d)** The  $^{13}\text{C}$ -fructose production rate in 6 different  
634 FBSs. **(e)** Amounts of AKR1B1 and SORD in sera of human cancer patients. **(f)** AKR1B1 KO  
635 blocked fructose production in tested cancer cells. **(g)** AKR1B1 inhibitor, epalrestat, suppressed  
636 the  $^{13}\text{C}$ -fructose transformation in FBS. **(h)** Sketch of the polyol pathway and fructose  
637 metabolism. In A549 cells, fructose specific metabolite, fructose-1-phosphate (F-1-P), highly  
638 depended on the polyol pathway. Only a trace amount of F-1-P can be detected in AKR1B1 KO  
639 cancer cells, while the compromised polyol pathway did not significantly affect glucose  
640 metabolism. The amounts of glucose specific metabolites, glucose-6-phosphate and fructose-6-  
641 phosphate (G-6-P and F-6-P), had no significant changes in A549 AKR1B1 KO cancer cells. **(i)**  
642 We tested the regulation of expressions of AKR1B1 according to glucose level in different  
643 cancer cells. The AKR1B1 expression was promoted significantly by high glucose level (25mM)  
644 in all tested cell lines. Data are represented as mean  $\pm$  SEM. \*: t-test  $p < 0.05$ ; \*\*: t-test  $p < 0.01$ .

645  
646

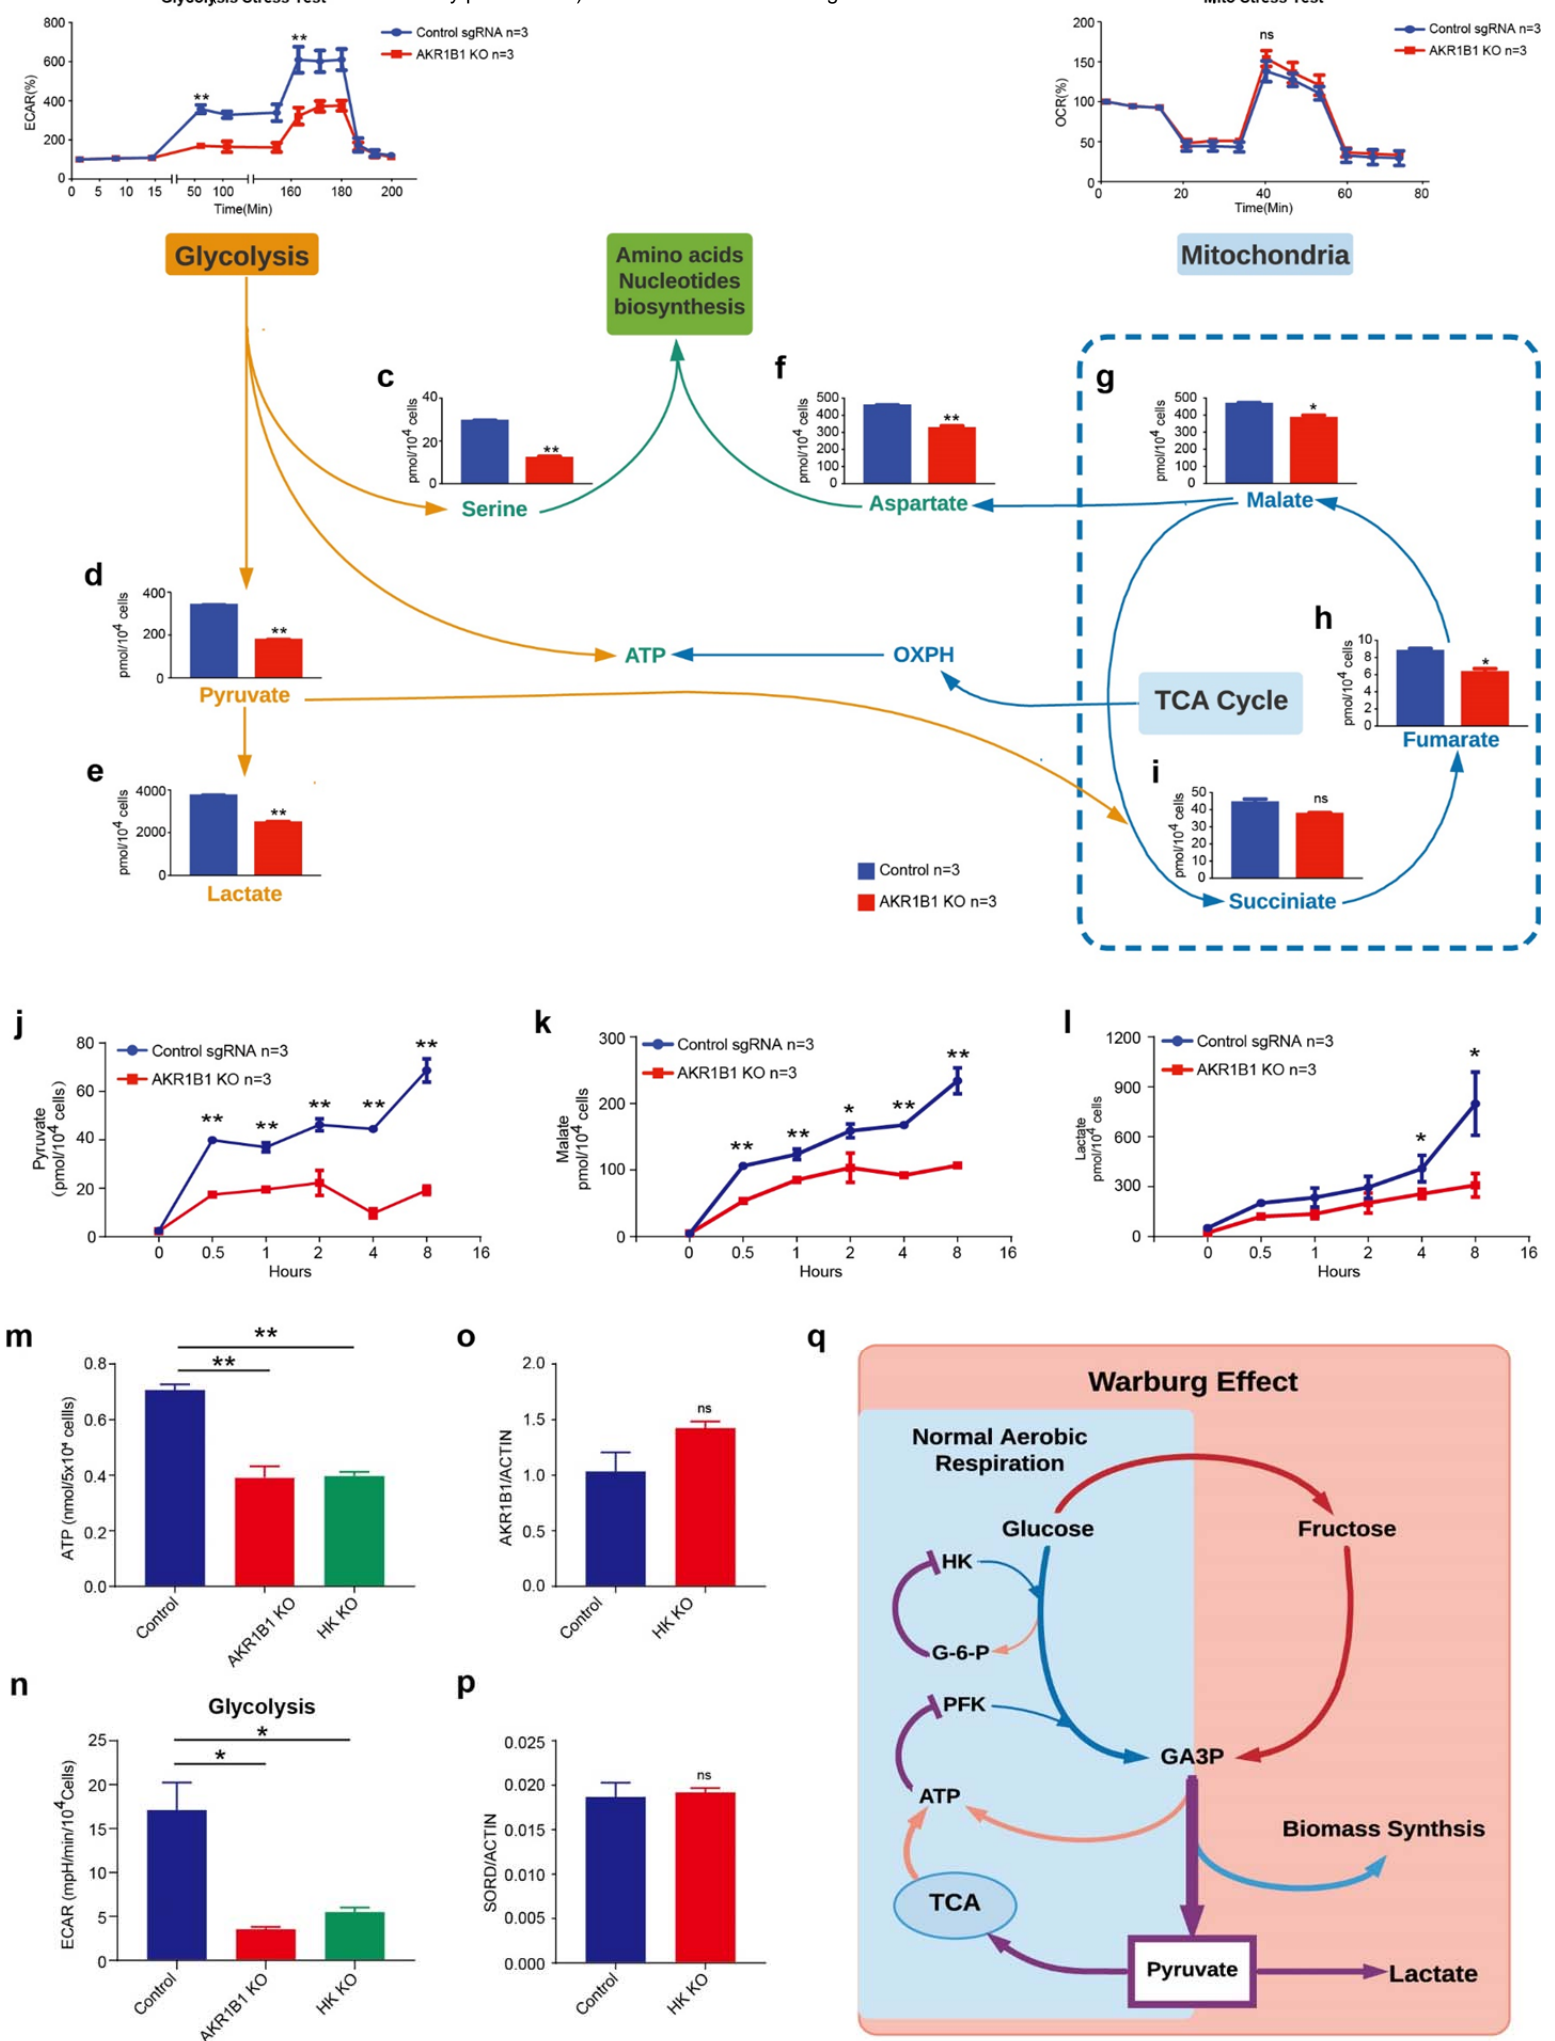

648 **Fig.2. Fructose metabolism enhances glycolysis in cancer cells**

649 **(a)** The Seahorse Cell Glycolysis Stress test showed compromised glycolysis in AKR1B1 KO  
650 A549 cells. **(b)** The Mito Stress test showed no significant change in mitochondrial function  
651 between A549 wild-type control and AKR1B1 KO cells. The direct metabolites from glycolysis,  
652 serine **(c)**, pyruvate **(d)**, and lactate **(e)** were significantly decreased in AKR1B1 KO cells. In  
653 comparison, TCA cycle-related metabolites, such as succinate **(i)**, fumarate **(h)**, malate **(g)**, and  
654 aspartate **(f)** were only slightly reduced in the KO cells. We also compared the flux of pyruvate  
655 **(j)**, malate **(k)**, and lactate **(l)** between wild-type control and AKR1B1 KO A549 cells when  
656 feeding with glucose after starving. The KO cells had slower rates in both of these metabolites.  
657 These changes would be expected to lead to diminished ATP production, as we observed **(m)** in  
658 AKR1B1 KO cells as well as HK KO cells. We then compared glucose and fructose metabolisms  
659 effects on glycolysis using the Seahorse glycolysis stress test **(n)**. To evaluate whether glucose  
660 metabolism affects the polyol pathway, AKR1B1 and SORD expressions were tested in glucose  
661 metabolism compromised cells **(o and p)**. **(q)** Sketch of fructose metabolism contributions to the  
662 Warburg effect. Data are represented as mean  $\pm$  SEM. \*: *t*-test  $p < 0.05$ ; \*\*: *t*-test  $p < 0.01$ .

663

664

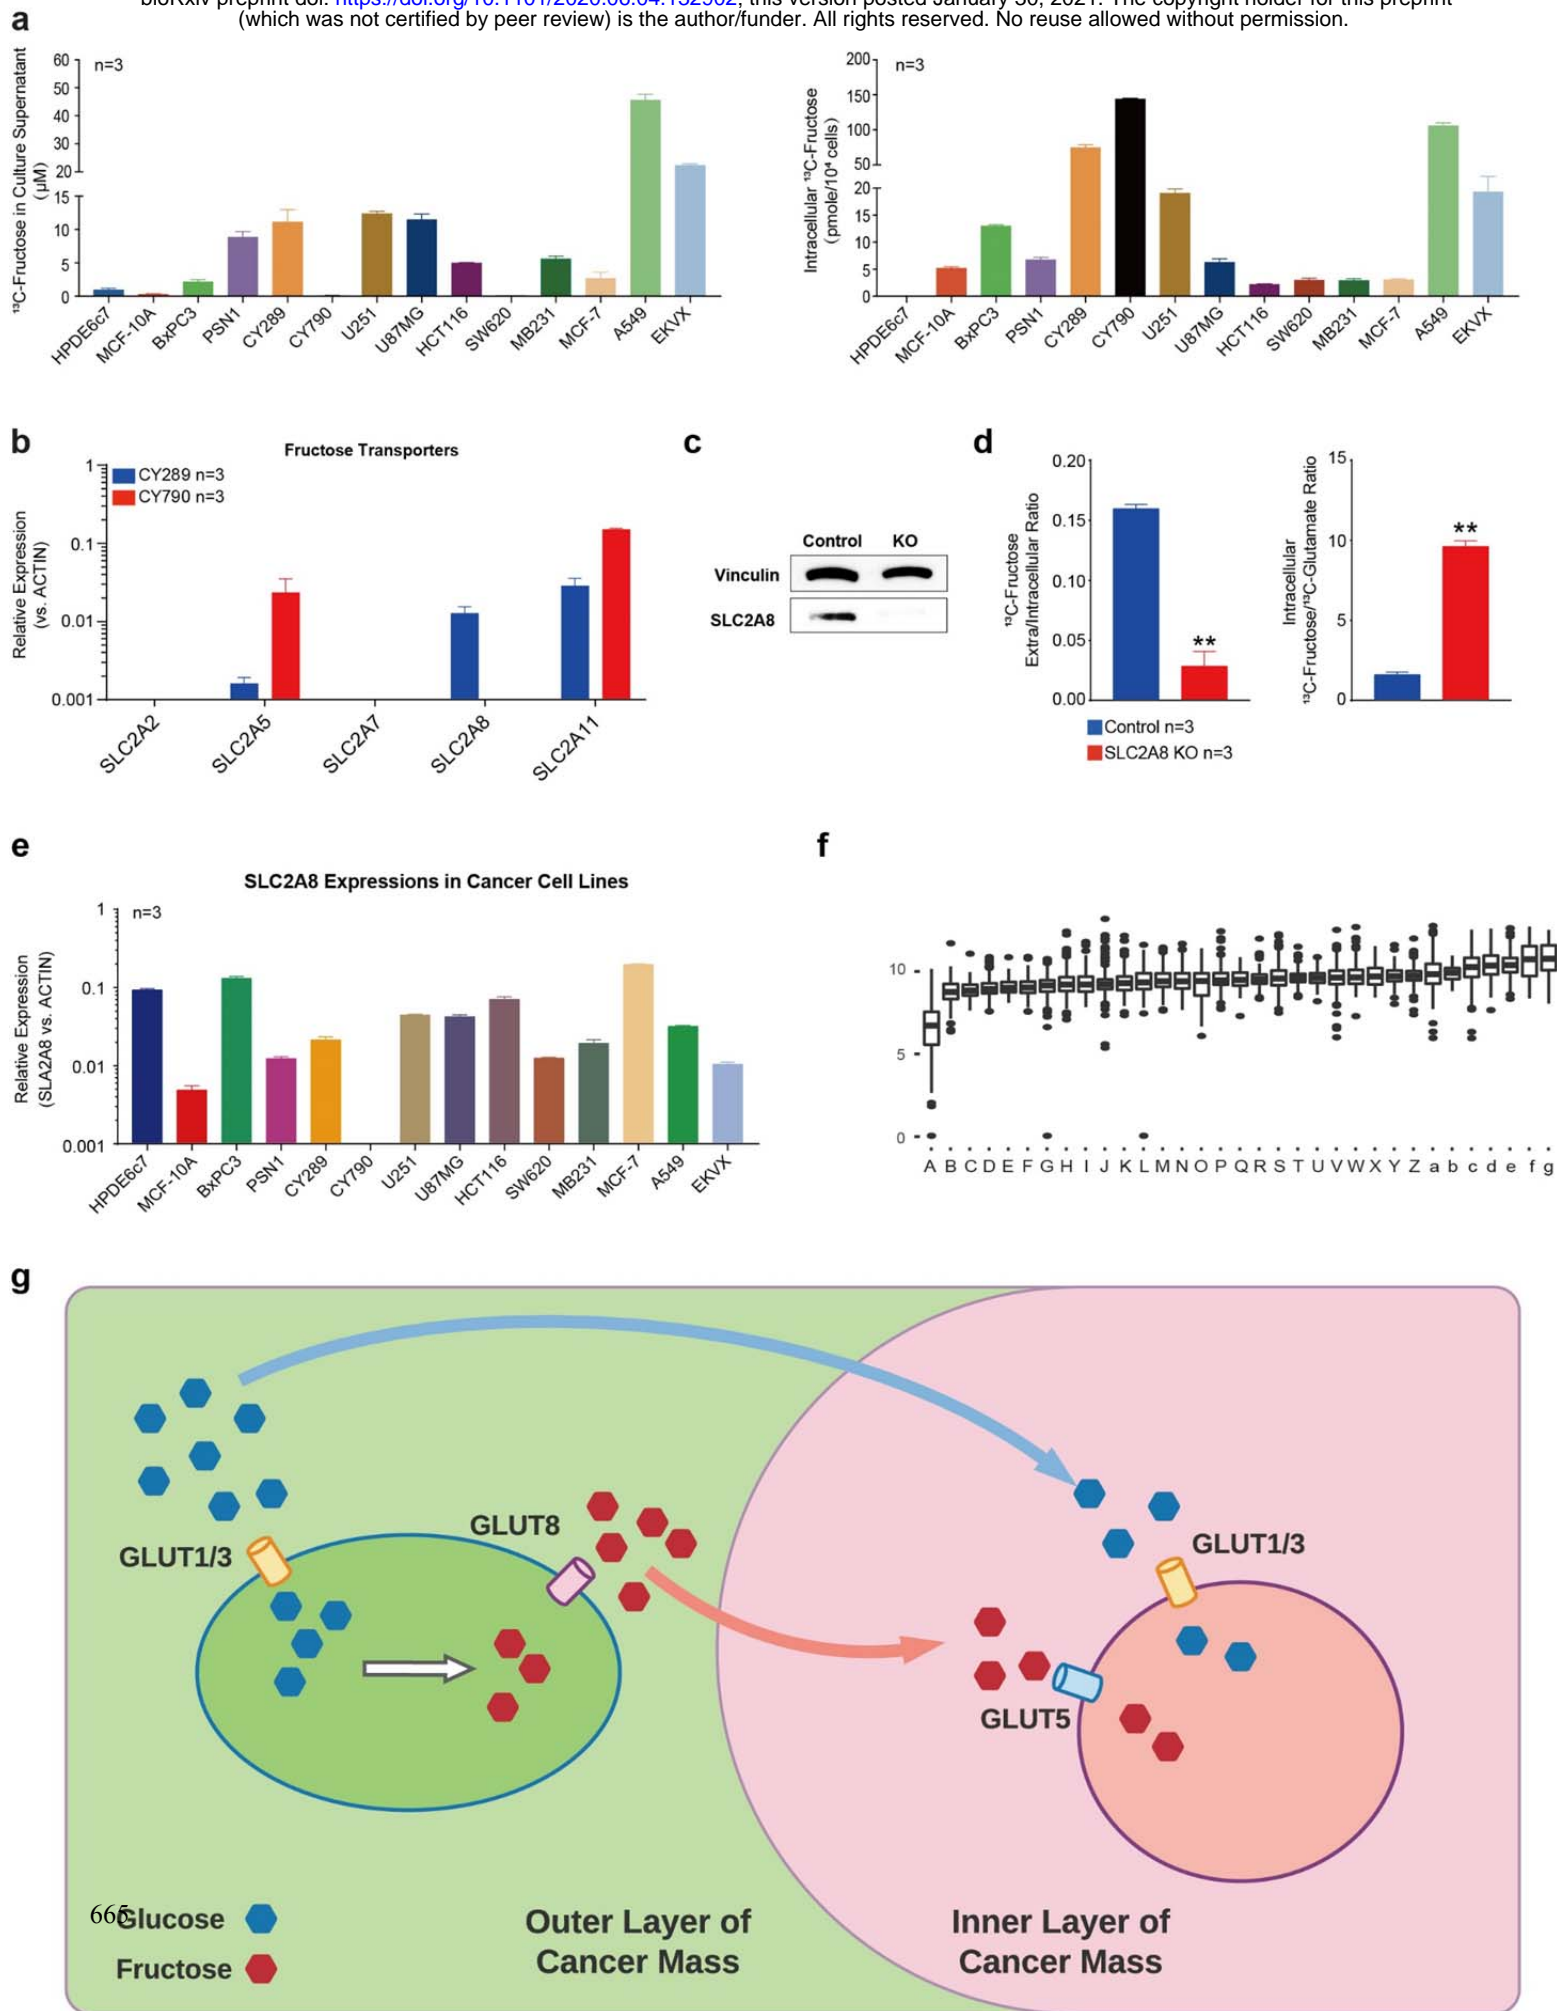

666 **Fig. 3. Cancer cells export endogenous fructose through the sugar transporter**  
667 **SLC2A8/GLUT8**

668 **(a)** We found that cancer cells that produced fructose can export it to the extracellular  
669 environment, and that fructose distribution is varied in different cancer cells. Some cells tended  
670 to keep fructose in the cytoplasm, and others exported more fructose to the culture medium. This  
671 may be due to differences in fructose transporter expression in different cancer cells. **(b)** We  
672 tested potential fructose transporter<sup>18-20</sup> expressions in two mesothelioma cell lines with different  
673 fructose distribution patterns and found that the expression of SLC2A8 was different between the  
674 two cell lines. **(c)** We generated SLC2A8 KO A549 cells by CRISPR/Cas9 technology and  
675 compared them with the control sgRNA group. **(d)** In SLC2A8 KO A549 cells, fructose export  
676 was highly suppressed, and the extracellular/intracellular fructose ratio was significantly reduced  
677 compared with the control group, while the intracellular fructose/glucose ratio was increased  
678 considerably. **(e)** SLC2A8 was also found to be widely expressed in cancer cells and **(f)** in  
679 human cancers according to the TCGA database, including: A. acute myeloid leukemia; B.  
680 thymoma; C. mesothelioma; D. thyroid carcinoma; E. cholangiocarcinoma; F. pancreatic  
681 adenocarcinoma; G. lung adenocarcinoma; H. breast invasive carcinoma; I. esophageal  
682 carcinoma; J. kidney clear cell carcinoma; K. head & neck squamous cell carcinoma; L. ovarian  
683 serous cystadenocarcinoma; M. lung squamous cell carcinoma; N. cervical & endocervical  
684 cancer; O. skin cutaneous melanoma; P. kidney papillary cell carcinoma; Q. uterine  
685 carcinosarcoma; R. pheochromocytoma & paraganglioma; S. stomach adenocarcinoma; T. brain  
686 lower grade glioma; U. glioblastoma multiforme; V. sarcoma; W. uterine corpus endometrioid  
687 carcinoma; X. diffuse large B-cell lymphoma; Y. testicular germ cell tumor; Z. prostate  
688 adenocarcinoma; a. bladder urothelial carcinoma; b. uveal melanoma; c. colon adenocarcinoma;  
689 d. rectum adenocarcinoma; e. liver hepatocellular carcinoma; f. kidney chromophobe; g.  
690 adrenocortical cancer. **(g)** Sketch of the fructose communication between cancer cells. Data are  
691 represented as mean  $\pm$  SEM. \*\*: *t*-test  $p < 0.01$ .

692

693

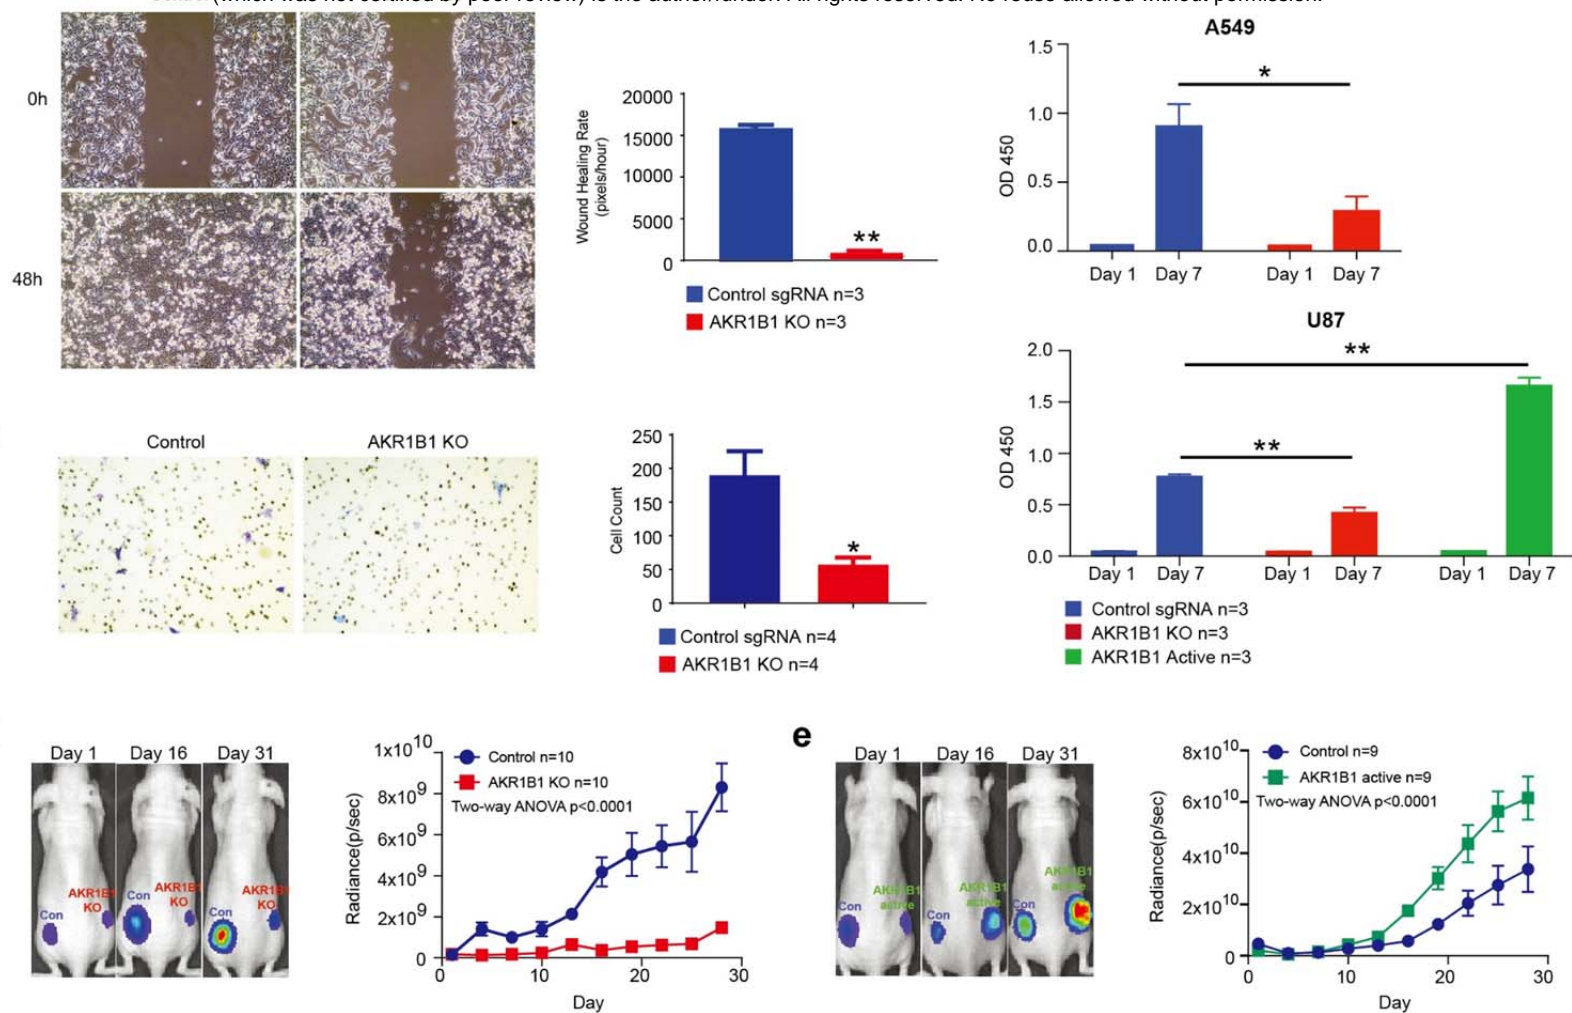

694 **Fig. 4. Fructose enhances cancer cell proliferation and malignancy**

695 **(a)** The A549 AKR1B1 KO cells showed suppressed cell migration in the wound healing assay  
 696 and **(b)** transwell assay. **(c)** The AKR1B1 KO cells slowed down cancer cell growths, and  
 697 overexpression of AKR1B1 caused increased growth rates of U87 cells *in vitro*. **(d)** An *in vivo*  
 698 xenograft model also showed growth suppression when AKR1B1 KO A549 cells were used, **(e)**  
 699 there was increased cancer cell proliferation when U87 cells were overexpressed in AKR1B1.  
 700 Data are represented as mean  $\pm$  SEM. \*: *t*-test  $p < 0.05$ ; \*\*: *t*-test  $p < 0.01$ .

701

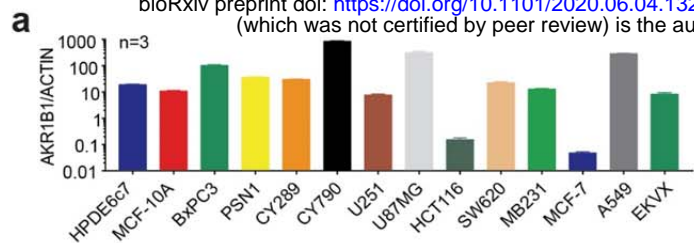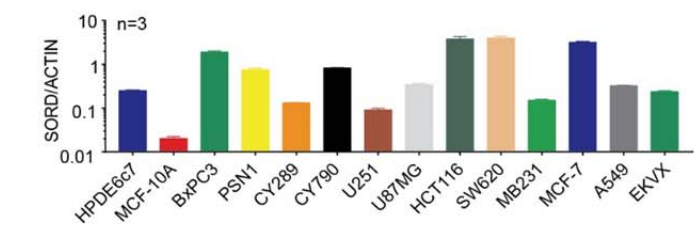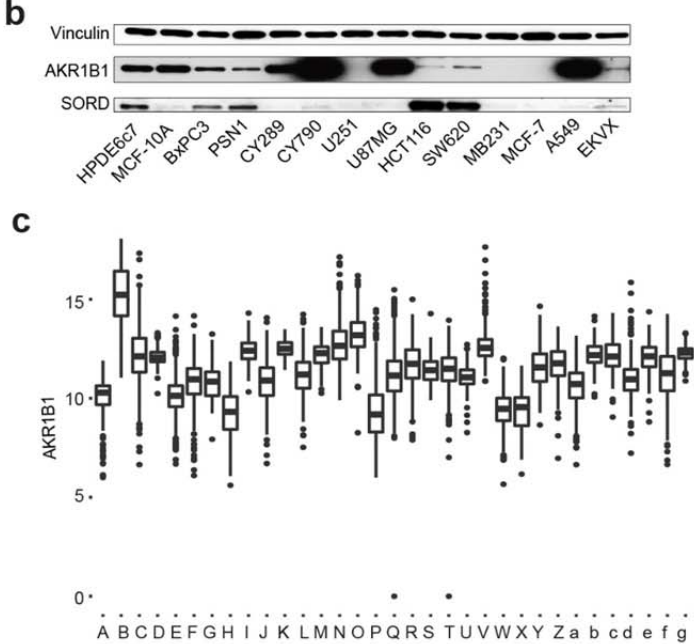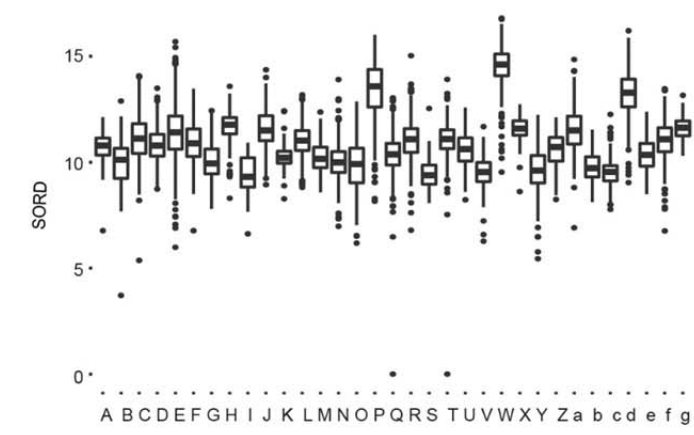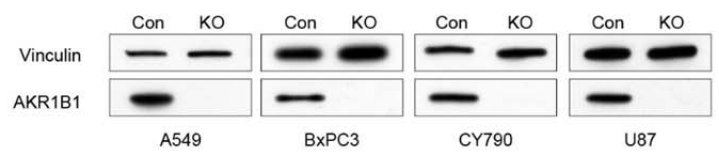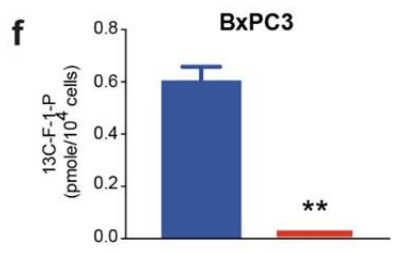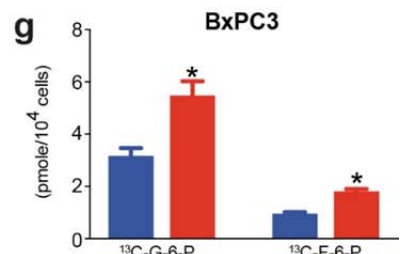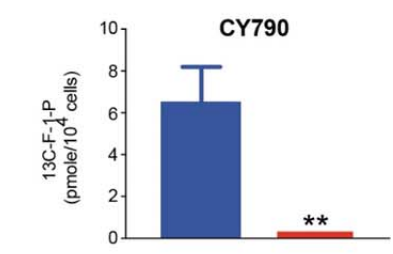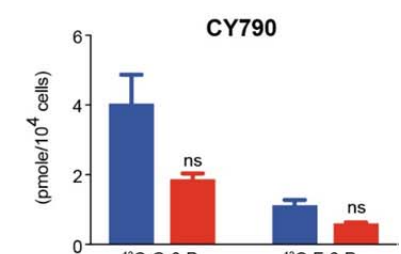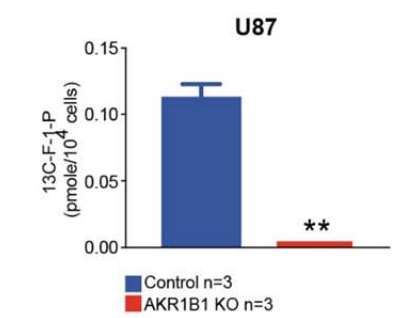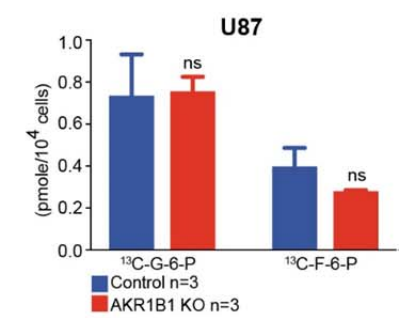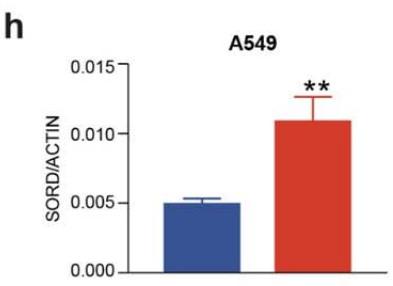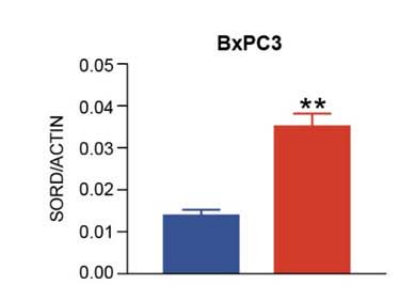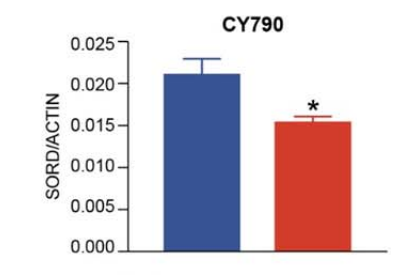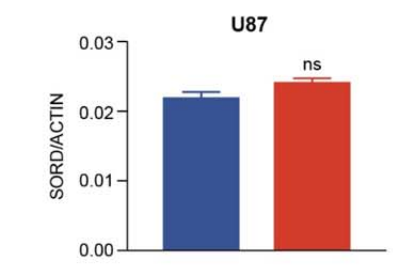

702 Extended Data Fig. 1

703 **(a-c)** Key enzymes of the polyol pathway, AKR1B1 and SORD, are widely expressed in multiple  
704 cancer cell lines at both mRNA **(a)** and protein **(b)** levels. **(c)** A TCGA database also showed  
705 expressions of these two genes in multiple human cancers. The cancer types are listed below: A.  
706 acute myeloid leukemia, B. adrenocortical cancer, C. bladder urothelial carcinoma, D. brain  
707 lower grade glioma, E. breast invasive carcinoma, F. cervical & endocervical cancer, G.  
708 cholangiocarcinoma, H. colon adenocarcinoma, I. diffuse large B-cell lymphoma, J. esophageal  
709 carcinoma, K. glioblastoma multiforme, L. head & neck squamous cell carcinoma, M. kidney  
710 chromophobe, N. kidney clear cell carcinoma, O. kidney papillary cell carcinoma, P. liver  
711 hepatocellular carcinoma, Q. lung adenocarcinoma, R. lung squamous cell carcinoma, S.  
712 mesothelioma, T. ovarian serous cystadenocarcinoma, U. pancreatic adenocarcinoma, V.  
713 pheochromocytoma & paraganglioma, W. prostate adenocarcinoma, X. rectum adenocarcinoma,  
714 Y. sarcoma, Z. skin cutaneous melanoma, a. stomach adenocarcinoma, b. testicular germ cell  
715 tumor, c. thymoma, d. thyroid carcinoma, e. uterine carcinosarcoma, f. uterine corpus  
716 endometrioid carcinoma, g. uveal melanoma. **(d)** AKR1B1 and SORD proteins in different  
717 FBSs. **(e)** CRISPR/Cas9 technology was used to successfully knocked out the AKR1B1 gene  
718 from multiple cancer cells as shown by Western blot, which indicated no detectable AKR1B1 in  
719 KO cancer cells. **(f)** Fructose specific metabolite, fructose-1-phosphate (F-1-P), highly depended  
720 on the polyol pathway. Only a trace amount of F-1-P can be detected in AKR1B1 KO cancer  
721 cells. **(g)** The compromised polyol pathway did not significantly affect glucose metabolism in  
722 most tested cancer cells. The amounts of glucose specific metabolites, glucose-6-phosphate and  
723 fructose-6-phosphate (G-6-P and F-6-P), only slightly increased in BxPC3 and had no significant  
724 change in other tested AKR1B1 KO cancer cells. We tested the regulation of expressions SORD  
725 **(h)** by glucose level in different cancer cells. \*: *t*-test  $p < 0.05$ ; \*\*: *t*-test  $p < 0.01$ .

726

727



**a**

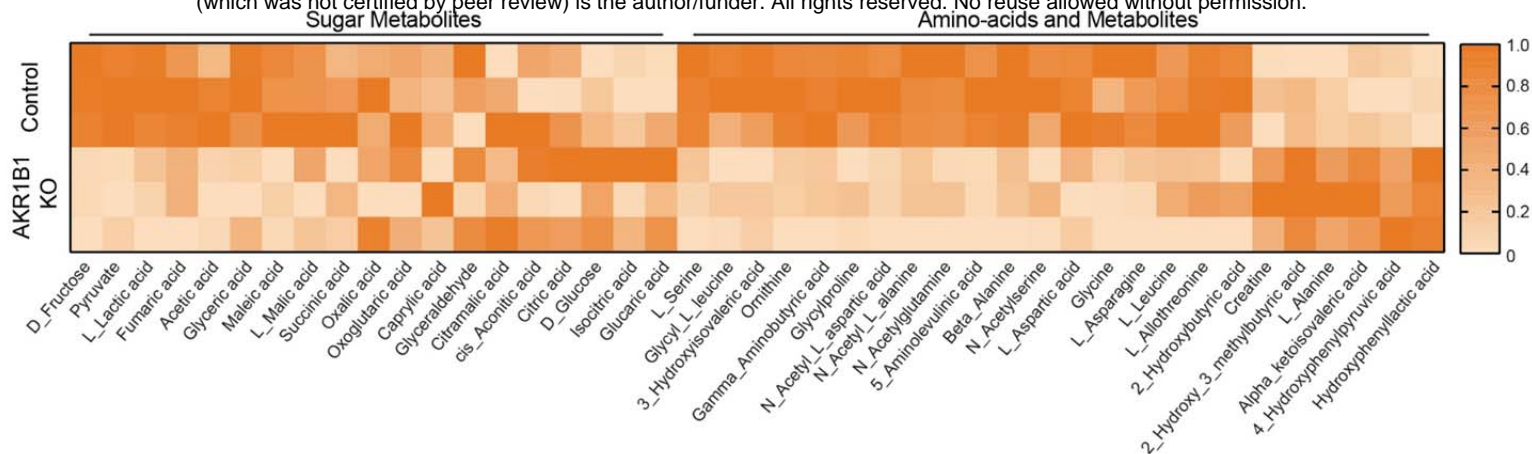

**b**

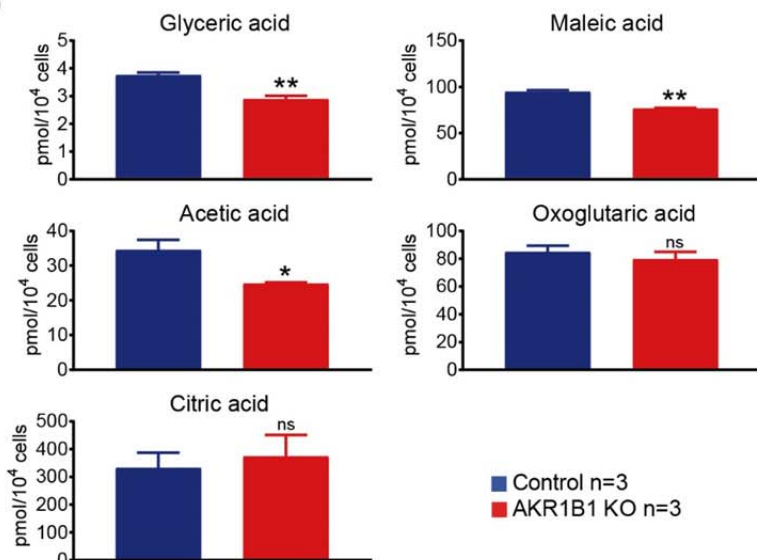

**c**

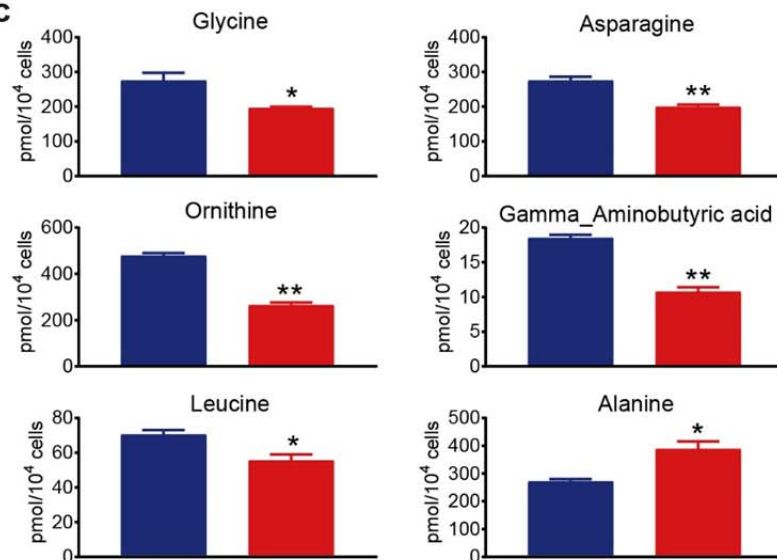

728 **Extended Data Fig. 2**

729 **(a)** Heat map of the results of metabolomics of wild-type control and AKR1B1 KO A549 cells.

730 The metabolites are categorized into "sugar metabolites", which includes metabolites related to

731 glucose and fructose metabolism, and "amino-acid and metabolites", which contains metabolites

732 related to amino-acid metabolism. **(b)** Metabolites related to glucose and fructose metabolism.

733 **(c)** Metabolites related to amino-acid metabolism. \*: *t*-test  $p < 0.05$ ; \*\*: *t*-test  $p < 0.01$ .

734

735

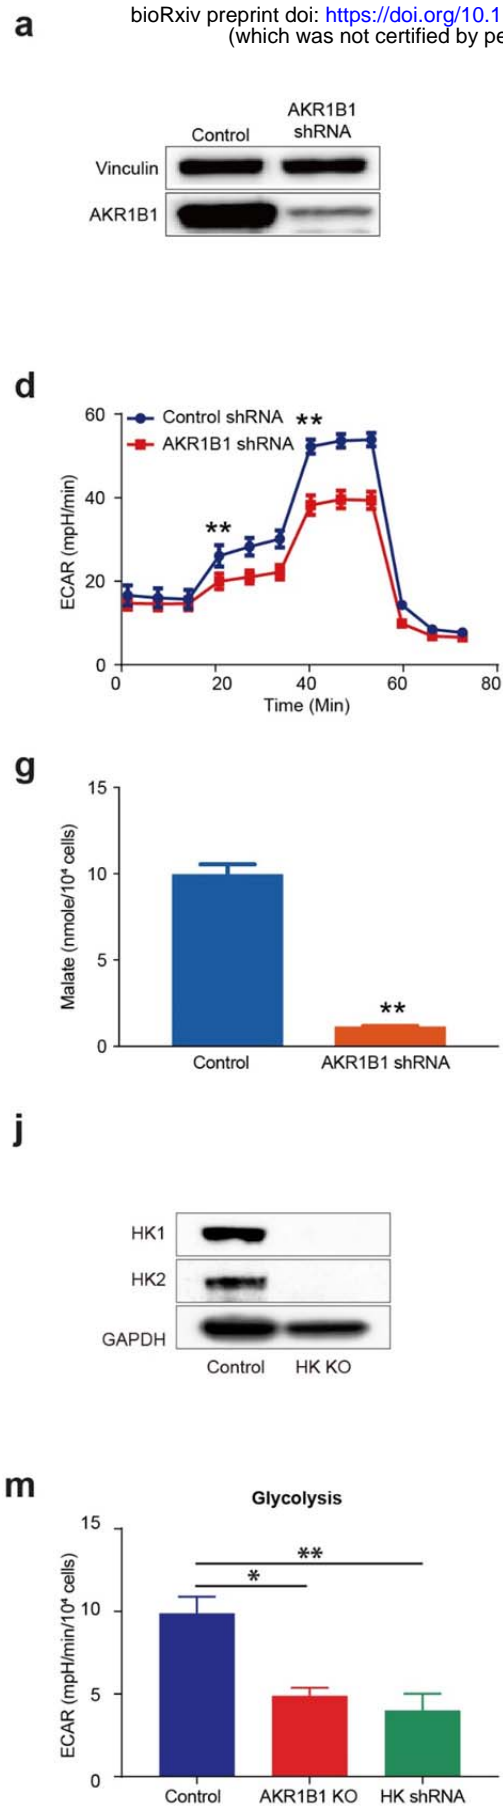

736 **Extended Data Fig. 3**

737 **(a)** We silenced the AKR1B1 gene expression from CY790 cells, as shown by Western blot,  
738 which indicated reduced AKR1B1 in shRNA treated cells. **(b)** AKR1B1 silencing reduced  
739 fructose production in CY790 cells. **(c)** The AKR1B1 silencing slowed down CY790 cell  
740 growth *in vitro*. **(d)** Seahorse Cell Glycolysis Stress test showed compromised glycolysis in  
741 AKR1B1 silenced CY790 cells. The pyruvate **(e)**, lactate **(f)**, and malate **(g)** were decreased in  
742 AKR1B1 silenced cells. While citrate **(h)** and succinate **(i)** were not significantly reduced in the  
743 AKR1B1 silenced cells. \*\*: *t*-test  $p < 0.01$ . **(j and k)** HK1 and HK2 expression in HK KO and  
744 silencing A549 cells. Compromised ATP production **(l)** and ECAR **(m)** were observed in HK  
745 silencing cells. **(n and o)** AKR1B1 and SORD expressions in HK silencing A549 cells.

746

747

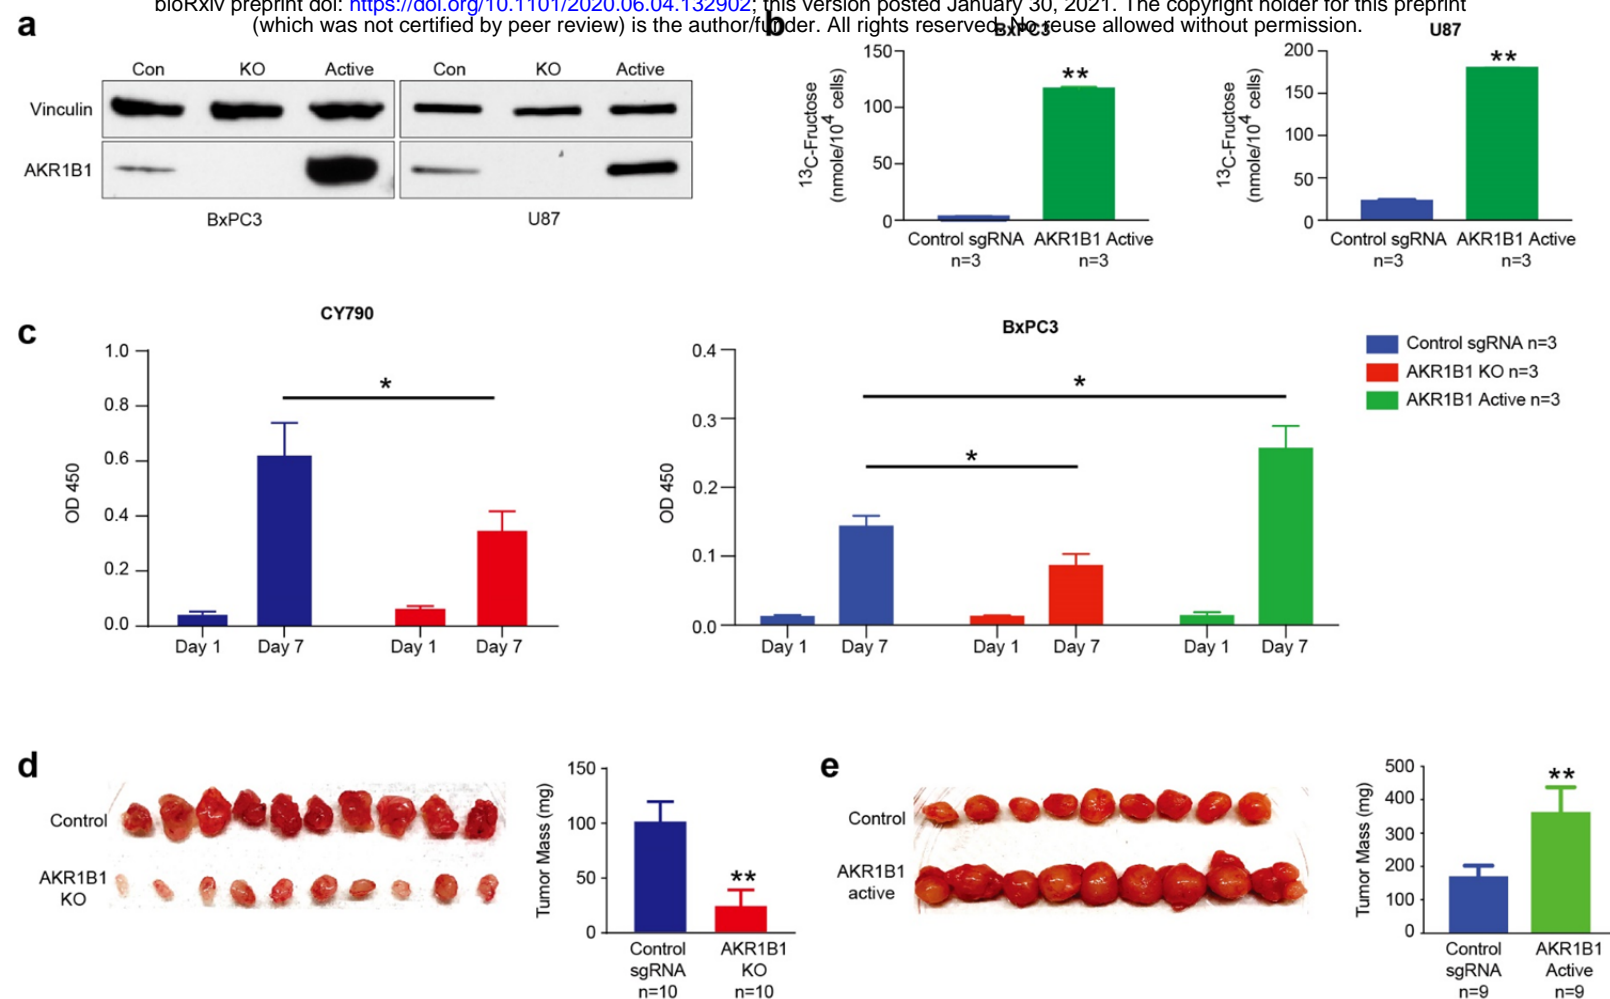

748 **Extended Data Fig. 4**

749 (a) CRISPRa/Cas9-VPR technology was used to overexpress AKR1B1 in cancer cells, and it  
 750 significantly increased AKR1B1 expression relative to controls. (b) Overexpression of AKR1B1  
 751 increased fructose productions in U87 and BxPC3 cells. (c) The AKR1B1 KO cells slowed  
 752 down cancer cell growths, and overexpression of AKR1B1 caused increased growth rates of  
 753 BxPC3 cells *in vitro*. (d) An *in vivo* xenograft model showed reduced tumor size when AKR1B1  
 754 KO A549 cells were used. (e) There was increased tumor mass when U87 cells were  
 755 overexpressed in AKR1B1. \*: *t*-test  $p < 0.05$ ; \*\*: *t*-test  $p < 0.01$ .

756  
 757

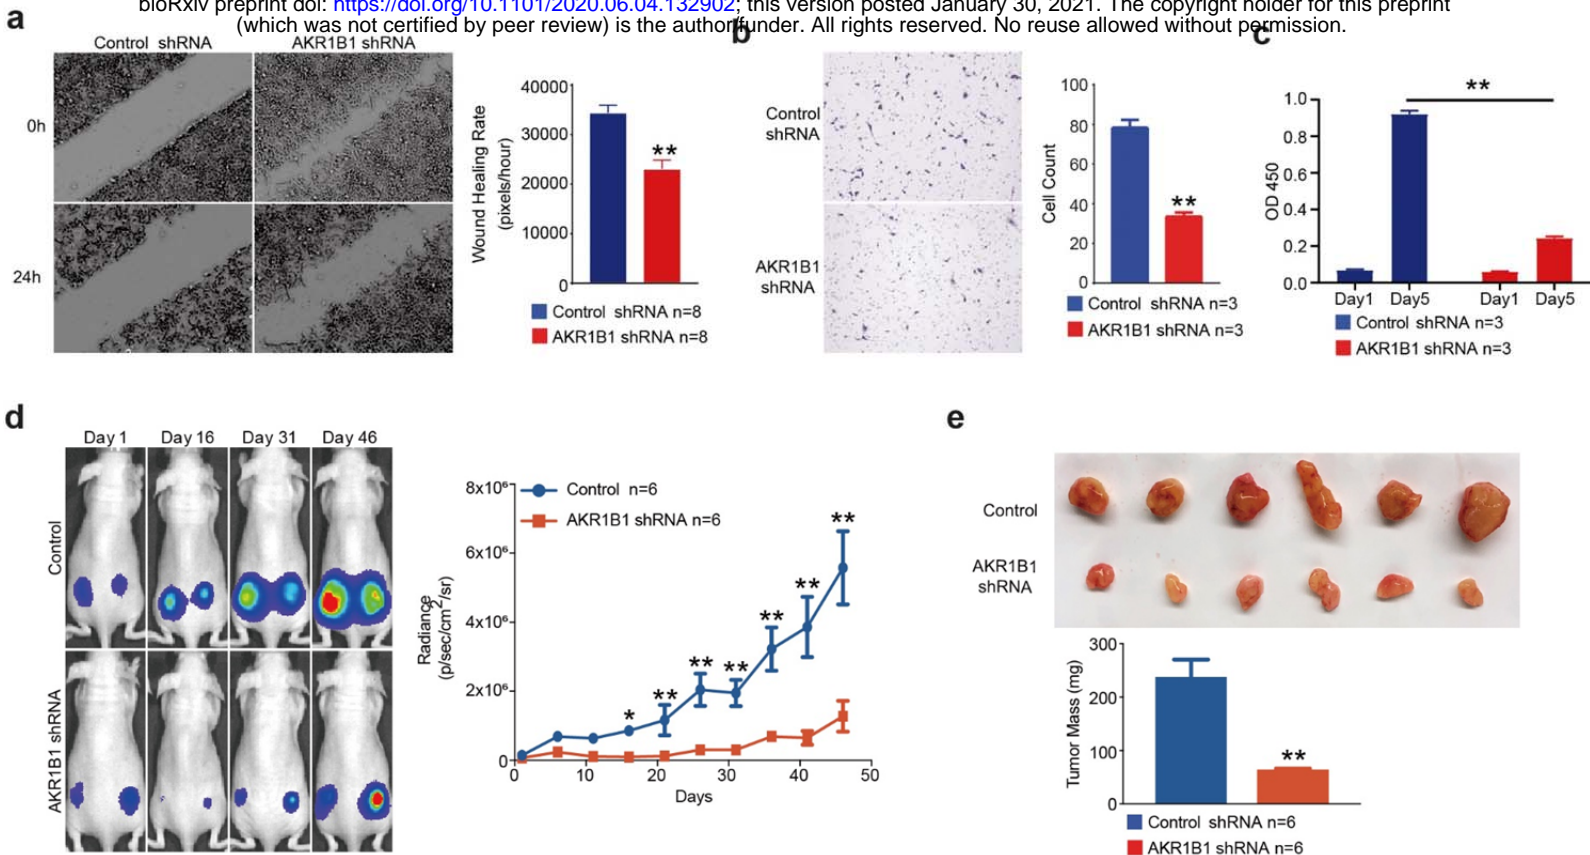

758 **Extended Data Fig. 5**

759 **(a)** The CY790 AKR1B1 silenced cells showed suppressed cell migration in the wound healing  
 760 assay and **(b)** transwell assay. **(c)** The AKR1B1 silenced CY790 cells slowed down cancer cell  
 761 growths *in vitro*. **(d)** and **(e)** An *in vivo* xenograft model showed growth suppression when  
 762 AKR1B1 silenced CY790 cells were used. \*: *t*-test  $p < 0.05$ ; \*\*: *t*-test  $p < 0.01$ .

763  
 764

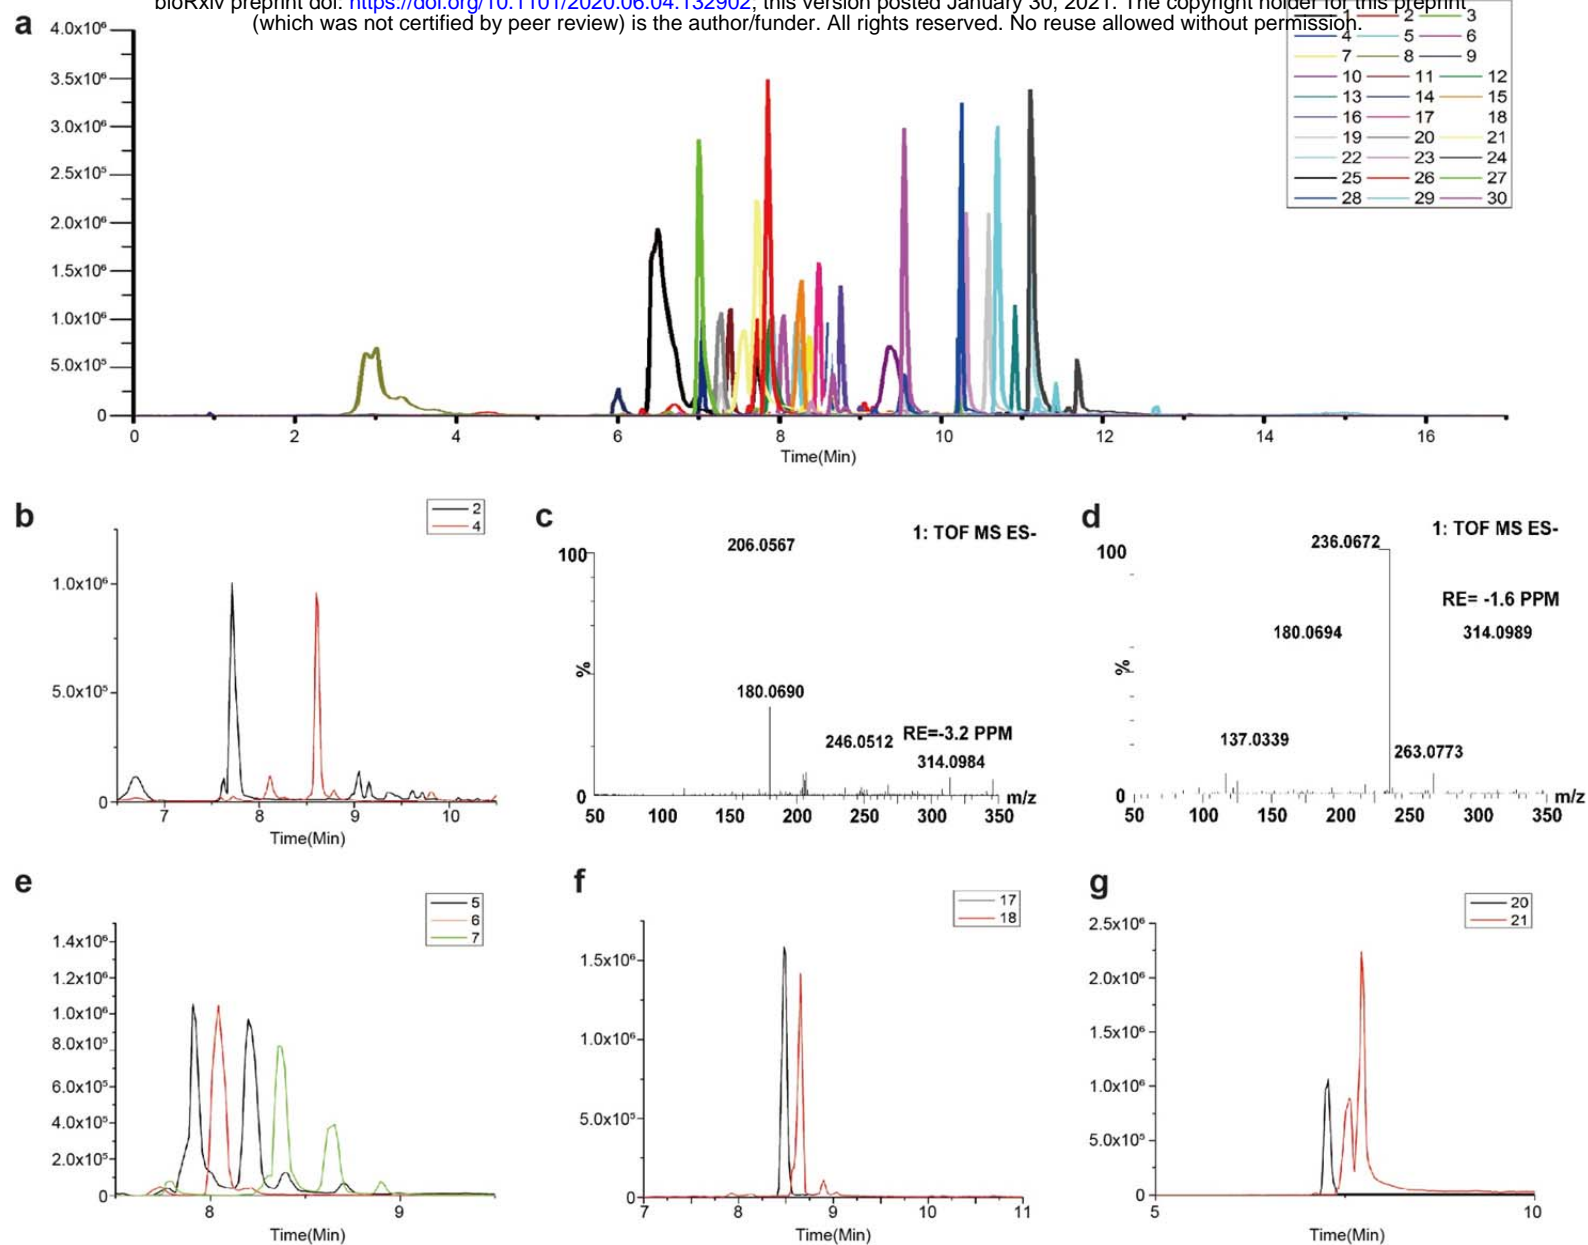

765 **Extended Data Fig. 6**

766 **(a)** UPLC/QTOF-MS of 3-NPH derivatives of metabolites. The labeled sugars are (1,2) D-  
 767 Glucose; (3,4) D-Fructose; (5) Glucose 6-phosphate; (6) Fructose 1-phosphate; (7) Fructose 6-  
 768 phosphate; (8) Glucose 1-phosphate; (9) Fructose 1,6-bisphosphate; (10) D-Glyceraldehyde 3-  
 769 phosphate/Dihydroxyacetone phosphate; (11) 3-phosphoglyceric acid, and (12) Lactate; (13)  
 770 Pyruvate; (14) 6-Phosphogluconic acid; (15) D-Sedoheptulose 7-phosphate; (16) D-Erythrose 4-  
 771 phosphate; (17) D-Ribose 5-phosphate; (18) D-Ribulose 5-phosphate; (19) Succinic acid; (20)  
 772 Isocitric acid; (21) Citric acid; (22) Oxoglutaric acid; (23) L-Malic acid; (24) Oxalacetic acid;  
 773 (25) L-Serine; (26) Glutamic acid; (27) L-Glutamine; (28) Aspartic Acid; (29) Hydroxypyruvate;  
 774 (30) Fumaric acid. **(b)** Representative IP-RP-UPLC-QTOF-MS chromatograms for separation  
 775 (2)glucose and (4)fructose. **(c)** Mass spectrum of glucose obtained on QTOF mass spectrometry.

776 **(d)** Mass spectrum of fructose obtained on QTOF mass spectrometry. Figure **(b)** and **(c)** show  
777 the postulated structures of the  $m/z$  206.06 and  $m/z$  236.07 fragment ions from glucose-3-  
778 NPHydrazone and fructose-3-NPHydrazone as a representative aldose and ketose, respectively.  
779 These two fragment ions were specific for aldoses and ketoses, respectively. The fragment ions  
780  $m/z$  206.06 and  $m/z$  236.07 were therefore used for the qualitative monitoring of (1)glucose and  
781 (3)fructose. **(e)** Representative IP-RP-UPLC-QTOF-MS chromatograms for separation (5)  
782 Glucose 6-phosphate; (6) Fructose 1-phosphate; (7) Fructose 6-phosphate. **(f)** Representative IP-  
783 RP-UPLC-QTOF-MS chromatograms for separation (17) D-Ribose 5-phosphate; (18) D-  
784 Ribulose 5-phosphate. **(g)** Representative IP-RP-UPLC-QTOF-MS chromatograms for  
785 separation (20) Isocitric acid; (21) Citric acid.

786  
787

788  
789

### Extended Data Table 1. Identification of metabolites in cells using UPLC-QTOF-MS

|                           |                              | Retention Time | Formula       | Calculated mass | Measured value | RE    |
|---------------------------|------------------------------|----------------|---------------|-----------------|----------------|-------|
|                           |                              | (min)          |               | M-H             |                | (ppm) |
| glycolysis                | D-Glucose                    | 7.74           | C12H17N3O7    | 314.0994        | 314.0984       | -3.2  |
|                           | D-Fructose                   | 8.6            | C12H17N3O7    | 314.0994        | 314.0989       | -1.6  |
|                           | Glucose 1-phosphate          | 2.23           | C12H18N3O10P  | 394.0657        | 394.0648       | -2.3  |
|                           | Fructose 1-phosphate         | 8.11           | C12H18N3O10P  | 529.1090        | 529.1091       | 0.2   |
|                           | Fructose 6-phosphate         | 8.4            | C12H18N3O10P  | 529.1090        | 529.1090       | 0.0   |
|                           | Glucose 6-phosphate          | 7.96           | C18H22N6O11P  | 529.1090        | 529.1089       | -0.2  |
|                           | Fructose 1,6-bisphosphate    | 6.01           | C18H24N6O14P2 | 609.0747        | 609.0744       | -0.5  |
|                           | D-Glyceraldehyde 3-phosphate | 9.13           | C15H17N6O8P   | 439.0767        | 439.0734       | -7.5  |
|                           | 3-phosphoglyceric acid       | 7.38           | C15H17N6O9P   | 455.0722        | 455.0688       | -7.5  |
|                           | Dihydroxyacetone phosphate   | 9.18           | C15H17N6O8P   | 439.0767        | 439.0734       | -7.5  |
|                           | Lactate                      | 7.91           | C9H10N3O4     | 224.0677        | 224.0662       | -6.7  |
|                           | Pyruvate                     | 10.91          | C9H9N3O4      | 357.0930        | 357.0930       | 0.0   |
|                           | 6-Phosphogluconic acid       | 6.97           | C18H23N6O12P  | 545.1033        | 545.1035       | 0.4   |
| Pentose phosphate pathway | D-Sedoheptulose 7-phosphate  | 8.26           | C19H25N6O12P  | 559.119         | 559.1197       | 1.3   |
|                           | D-Erythrose 4-phosphate      | 8.79           | C16H19N6O9P   | 469.0873        | 469.085        | -4.9  |
|                           | D-Ribose 5-phosphate         | 8.51           | C17H20N6O10P  | 499.0979        | 499.0966       | -2.6  |
|                           | D-Ribulose 5-phosphate       | 8.66           | C17H21N6O10P  | 499.0984        | 499.0968       | -3.2  |
| Citric acid cycle         | Succinic acid                | 10.57          | C16H15N6O6    | 387.1059        | 387.1028       | -8.0  |
|                           | Isocitric acid               | 7.22           | C18H17N6O9    | 461.1057        | 461.1042       | -3.3  |
|                           | Citric acid                  | 7.73           | C18H17N6O9    | 461.1062        | 461.1029       | -7.2  |
|                           | Oxoglutaric acid             | 11.17          | C23H20N9O8    | 550.1440        | 550.1436       | -0.7  |
|                           | L-Malic acid                 | 10.29          | C16H16N6O7    | 403.1002        | 403.0966       | -8.9  |
|                           | Oxalacetic acid              | 11.1           | C22H19N9O8    | 536.1278        | 536.1284       | 1.1   |
| Others                    | L-Serine                     | 6.04           | C9H11N4O4     | 239.0786        | 239.0754       | -13.4 |
|                           | Glutamic acid                | 7.84           | C11H11N4O4    | 263.078         | 263.0742       | -14.4 |
|                           | L-Glutamine                  | 7.04           | C11H14N5O4    | 280.1046        | 280.1003       | -15.4 |
|                           | Aspartic Acid                | 10.23          | C16H16N7O6    | 402.1162        | 402.113        | -8.0  |
|                           | Hydroxypyruvate              | 10.72          | C15H13N6O6    | 373.0897        | 373.0858       | -10.5 |
|                           | Fumaric acid                 | 9.43           | C16H13N6O6    | 385.0897        | 385.0856       | -10.6 |

790  
791
